# LAMINAR MECHANISMS OF SACCADIC SUPPRESSION IN PRIMATE VISUAL CORTEX

Sachira Denagamage<sup>1,2</sup>, Mitchell P. Morton<sup>1,2</sup>, John H. Reynolds<sup>4</sup>, Monika P. Jadi<sup>1,2,3,\*</sup> and Anirvan S. Nandy<sup>1,2,\*</sup>

<sup>1</sup>Department of Neuroscience, Yale University, New Haven, CT 06511

<sup>2</sup>Interdepartmental Neuroscience Program, Yale University, New Haven, CT 06511

<sup>3</sup>Department of Psychiatry, Yale University, New Haven, CT 06511

<sup>4</sup>Systems Neurobiology Laboratories, The Salk Institute for Biological Studies, La Jolla, CA 92037

\*co-senior and corresponding authors

Correspondence: [monika.jadi@yale.edu](mailto:monika.jadi@yale.edu), [anirvan.nandy@yale.edu](mailto:anirvan.nandy@yale.edu)

## ABSTRACT

Saccades are a ubiquitous and crucial component of our visual system, allowing for the efficient deployment of the fovea and its accompanying neural resources. Initiation of a saccade is known to cause saccadic suppression, a temporary reduction in visual sensitivity<sup>1,2</sup> and visual cortical firing rates<sup>3-6</sup>. While saccadic suppression has been well characterized at the level of perception and single neurons, relatively little is known about the visual cortical networks governing this phenomenon. Here we examine the effects of saccadic suppression on distinct neural subpopulations within visual area V4. We find cortical layer- and cell type-specific differences in the magnitude and timing of peri-saccadic modulation. Neurons in the input layer show changes in firing rate and inter-neuronal correlations prior to saccade onset, indicating that this layer receives information about impending saccades. Putative inhibitory interneurons in the input layer elevate their firing rate during saccades, suggesting they play a role in suppressing the activity of

other cortical subpopulations. A computational model of this circuit recapitulates our empirical observations and demonstrates that an input layer-targeting pathway can initiate saccadic suppression by enhancing local inhibitory activity. Collectively, our results provide a mechanistic understanding of how eye movement signaling interacts with cortical circuitry to enforce visual stability.

## INTRODUCTION

As we observe the world around us, our eyes dart from point to point. Each of these shifts in gaze is a saccade – a ballistic movement of both eyes. Saccades significantly improve the efficiency of the primate visual system by allowing us to flexibly deploy our fovea, the dedicated high acuity zone at the center of the retina, towards objects of interest in our environment. However, saccades also pose a substantial challenge for ongoing visual processing, as each saccade produces abrupt and rapid motion across the retina. Therefore, saccades are also accompanied by a temporary reduction in visual sensitivity, termed saccadic suppression, that serves to blunt our perception of this motion<sup>1,2</sup>. Perhaps reflecting the diminished sensory processing during saccades, the firing rates of neurons in many regions of the visual cortex are also transiently suppressed<sup>3-6</sup>. Yet, despite extensive psychophysical characterization and single neuron electrophysiological analysis, relatively little is known about the circuit level mechanisms underlying saccadic suppression in the visual cortex. One prevailing hypothesis suggests that saccadic suppression is mediated by a corollary discharge signal originating in the brain regions responsible for initiating eye movements<sup>7-9</sup>. Given the synaptic and motor delays accompanying the execution of the saccadic motor command, a coincident corollary discharge to the visual cortex could trigger compensatory mechanisms prior to the start of the eye movement. Consistent with this idea, changes in neural

activity before saccade onset have been observed in several visual cortical areas<sup>5</sup>. However, despite clear neural evidence that the visual cortex receives information about upcoming saccades, the pathway by which a saccadic signal arrives in the visual cortex is unknown, and how that signal interacts with local circuitry to mediate saccadic suppression remains unclear.

We examined these questions within visual area V4, a critical hub in the visual processing stream responsible for object recognition<sup>10</sup>. V4 is known to exhibit saccadic suppression in both humans<sup>4</sup> and macaques<sup>6</sup>, and undergoes dynamic shifts in stimulus sensitivity during the preparation of saccades<sup>11</sup>. To investigate the underlying neural mechanisms, we studied saccadic suppression in the context of the laminar cortical circuit, which is composed of six layers with highly stereotyped patterns of intra- and inter-laminar connectivity<sup>12,13</sup>. In higher-order visual areas, such as V4, layer IV (the *input* layer) is the primary target of projections carrying visual information from lower-order areas, such as V1, V2, and V3<sup>14,15</sup>. After arriving in the input layer, visual information is then processed by local neural subpopulations as it is sent to layers II/III (the *superficial* layer) and layers V/VI (the *deep* layer), which serve as output nodes in the laminar circuit<sup>12,16</sup>. In V4, the superficial and deep layers feed information forward to downstream visual areas, such as ST<sup>17</sup>, TEO<sup>18</sup>, and TE<sup>19</sup>. Alongside feedforward input from lower-order visual areas, V4 also receives projections from other cortical regions, such as the prefrontal cortex<sup>15</sup>, as well as from subcortical structures<sup>20</sup>. Accordingly, several pathways targeting V4 could be responsible for relaying information about upcoming saccades: 1) projections from lower visual areas (V1/V2/V3), which predominantly target the input layer<sup>14,15</sup>, 2) a projection from the frontal eye fields (FEF), which predominantly targets the superficial and deep layers<sup>21,22</sup>, and 3) a projection from the pulvinar, which predominantly targets the superficial and input layers<sup>23-25</sup>. Neurons in

VI<sup>26,27</sup>, FEF<sup>28-30</sup>, and pulvinar<sup>31-33</sup> are known to respond to saccades, and the corresponding pathways are therefore strong candidates for initiating saccadic suppression in V4.

Given the organization of cortical circuitry, we reasoned that a saccadic signaling pathway should target the site of entry for visual information, the input layer, to suppress visual processing most efficiently. Furthermore, considering the similarities between peri-saccadic stimulus processing and general reductions in visual gain<sup>6,26</sup>, we considered whether saccadic suppression might be mediated in a manner comparable to visual gain modulation. Specifically, we hypothesized that an elevation in local inhibitory activity, a common mechanism for gain control<sup>34-36</sup>, functionally suppresses neural processing in V4 during saccades. We sought to confirm our predictions by utilizing a cortical layer-specific recording approach in combination with electrophysiological cell type classification to simultaneously record from six well-defined neural subpopulations in V4.

## RESULTS

### Dissociating the Effects of Vision and Eye Movements

Past approaches for studying saccadic modulation have typically involved cued saccade tasks<sup>4,6,26,37</sup>, which risk conflating the neural effects of visual stimulus processing with the neural effects of saccades. To dissociate saccadic signaling from visually induced activity in area V4, we performed a series of spontaneous recordings while two rhesus macaques were seated in the dark. We found that despite their inability to observe specific objects in the environment, both animals continued to make saccades freely under these conditions. Spontaneous neural activity also remained well above the level of noise (Figure S1A). We identified individual saccades by estimating the onset and offset times of ballistic eye movements (see Methods). To remove

fixational eye movements (microsaccades), we discarded saccades with amplitudes less than 0.7 degrees of visual angle. Additionally, to prevent the neural effects of one eye movement from overlapping with those of the next, we only included saccades that were separated from one another by at least 500 ms. This approach provided us with a set of 4420 saccades that were used for all subsequent analyses. We evaluated the quality of our eye movement dataset by examining amplitude and velocity traces from individual saccades, as well as by characterizing the main sequence. The main sequence is the approximately linear amplitude-velocity relationship observed across all saccades<sup>38</sup>, which we found held true for our data (Figure 1A).

While the monkeys were making spontaneous saccades, we simultaneously recorded neural activity from well-isolated single-units ( $n = 211$ ), multi-units ( $n = 110$ ), and local field potentials (LFPs) using linear array probes in area V4. The use of recording chambers containing an optically-transparent artificial dura allowed us to make electrode penetrations perpendicular to the cortical surface, and therefore in good alignment with individual cortical columns (see Methods). The alignment of each penetration was confirmed by mapping receptive fields along the depth of cortex, with overlapping receptive fields indicating proper alignment (Figure 1B). Laminar boundaries were identified with current source density (CSD) analysis<sup>39,40</sup>. The CSD, defined as the second spatial derivative of the LFP, maps the location of current sources and sinks along the depth of the probe. Each layer of the visual cortex produces a characteristic current source-sink pattern in response to visual stimulation, with the input layer producing a current sink followed by a current source, and the superficial and deep layers producing the opposite pattern of activity (Figure 1C). By identifying transitions between current sources and sinks, we assigned laminar identities to each of our recording sites (Figure 1D – LFP traces colored by layer). We also separated well-isolated single-units into two populations based on their waveform duration:

narrow-spiking units, corresponding to putative inhibitory interneurons, and broad-spiking units, corresponding to putative excitatory neurons (Figure 1D – spikes colored by unit type)<sup>41-43</sup>. The three cortical layers and two unit types thus gave us six distinct neural subpopulations to consider in subsequent analyses.

# **Narrow-Spiking Input Layer Units Show Positive Peri-Saccadic Modulation**

To evaluate neural subpopulation-specific responses, we first estimated the peri-saccadic firing rate of well-isolated single-units with a kernel-based approach, in which each spike is convolved with a gaussian kernel<sup>44</sup> (Figure S1B). We selected the kernel bandwidth on a unit-by-unit basis at each point in time using an optimization algorithm that minimizes mean integrated squared error<sup>45</sup>. When looking at units grouped by cell type, narrow-spiking units exhibited less peri-saccadic suppression than broad-spiking units (Figure 2A). The cause of this difference became clear when the units were further separated by layer. All laminar subpopulations of broad-spiking units displayed peri-saccadic suppression, as did narrow-spiking units in the superficial and deep layers. In contrast, narrow-spiking input layer units elevated their firing rate in response to a saccade (Figure 2B-C; see Figure S2 for additional single-unit examples).

To quantify these observations, we calculated a modulation index that represents the degree to which the firing rate of each unit deviated from its pre-saccadic baseline activity (see Methods). We found that narrow-spiking input layer units were the only group with a positive modulation index (indicating an increase in firing rate), which was significantly different from most other subpopulations (Figure 2D). We also noted that at the single-unit level, each of the six subpopulations had some proportion of positively modulated units (Figure S3). Therefore, the difference in subpopulation level firing rates could be caused by narrow-spiking input layer

neurons having a greater average magnitude of positive modulation, or by having a greater proportion of positively modulated units. We determined both to be true. Narrow-spiking input layer neurons displayed a larger magnitude of positive modulation (Figure 2E) and were also more likely to be positively modulated (Figure 2F). We found it particularly striking that, in accordance with our hypothesis, only the narrow-spiking input layer subpopulation (i.e., putative inhibitory interneurons) showed an enhancement in firing. This led us to believe that an elevation in input layer inhibitory activity could be responsible for the peri-saccadic suppression of firing within the visual cortex reported previously<sup>3-6</sup>.

### **Input Layer Units Respond Prior to Saccades**

To gate out visual signals received during a saccade, neurons in the cortical layer initiating suppression would need to be activated prior to the start of the eye movement. To confirm that this was true for the input layer, we performed a timing analysis to determine whether any of the recorded subpopulations show significant changes in firing rate prior to saccade onset. For each single-unit, we found the time at which their activity first deviated outside a 95% confidence interval calculated from their pre-saccadic baseline activity, an event that was marked as the time of first significant response. The results of this approach for six example units (the same example units as in Figure S1B) are illustrated in Figure 3A. While there was response variability at the level of single-units, the input layer subpopulations (both narrow- and broad-spiking) were the only ones that responded prior to saccade onset (Figure 3B). This provides strong evidence that the input layer receives information about upcoming saccades with sufficient time to enact changes in activity throughout the cortical column.

# **Saccades Increase Correlated Variability in the Input Layer**

If input layer neurons receive pre-saccadic excitation from a common source, that signaling should also manifest itself as an increase in correlated variability among pairs of input layer units prior to saccade onset. To test this, we computed spike count correlations (SCC) between pairs of simultaneously recorded single- and multi-units as a function of time, and pooled these results into six groups on the basis of their pairwise laminar locations. All pair types showed a substantial increase in SCC around the time of saccades (Figure S4A). We quantified the precise time at which correlations first began to rise with a bootstrap analysis (see Methods). SCC began increasing prior to saccade onset in input-input pairs (Figure 4A), but after saccade onset in all other pairs (Figure 4B). This pattern of activity is consistent with the pre-saccadic arrival of a signal that is shared among input layer units. The delayed response of all other pair types suggests that they inherit their activity from the input layer. Additionally, the time at which input-input correlations began to rise (~40 ms before saccade onset) is remarkably similar to the time at which input layer units began to show firing rate modulation (also ~40 ms before saccade onset), further indicating that these two observations have a common cause: the activation of a saccadic signaling pathway.

Alongside the expected rise in correlations, we also found a reduction in correlations that began ~250 ms prior to saccade onset among input-input pairs. Because the timing of this drop precedes saccadic initiation, which begins ~150 ms before saccade onset<sup>46,47</sup>, it could not be the result of a corollary discharge signal. Instead, it may reflect the shift in internal state that occurs before saccadic initiation as the subject shifts their attention towards a potential target location<sup>48</sup>. In accordance with this possibility, pupil diameter, a well-established correlate of internal state<sup>49,50</sup>, begins to ramp up several hundred milliseconds prior to saccade onset (Figure S4B)<sup>51</sup>. Similar



shifts in internal state are known to be accompanied by comparable reductions in correlated variability<sup>50,52-54</sup>.

To further characterize changes in coordinated peri-saccadic activity, we also examined differences in spike-spike coherence (SSC) before and after saccade onset. Spike-spike coherence is a measure of the degree to which the activity of two signals, in this case a pair of simultaneously recorded single- and/or multi-units, fluctuates together across a range of frequencies. We found that saccade onset increases wide-band coherence most prominently in the input layer, with weaker, but still significant, effects in the superficial and deep layers (Figure 4C). When quantified as a modulation index (Figure 4D), we observed significant modulation in all layers at all frequencies, with the exception of the 30-100 Hz band in the superficial layer. The input layer exhibits larger increases in coherence, particularly at higher frequencies, while the deep layer experiences smaller increases, particularly at lower frequencies. Collectively, these data suggest that saccade onset leads to a temporary elevation of correlated activity, which manifests itself most prominently in the input layer. The timing and magnitude of changes in correlated variability, measured with both SCC and SSC, further suggests that an external signal arrives prior to saccade onset within the input layer before then propagating to the other layers.

## **Saccades Increase the Strength of Low-Frequency Wide-Band Activity**

Increases in coordinated activity at the level of single neurons can result in an elevation of population-level wide-band activity. To determine whether this held true for saccades, we calculated the spectral power, a frequency-resolved measure of signal strength, of the LFP around the time of saccade onset. Saccade onset was associated with a large elevation in low frequency power, and a slight reduction in high frequency power (Figure 5A). Comparing the power spectrum

before and after saccade onset, we found that these differences were significant in all three frequency bands tested, with an elevation in the 0-12 Hz and 15-25 Hz bands and a reduction in the 30-80 Hz band after saccade onset (Figure 5B). Next, we sought to investigate whether the increased strength of low-frequency wide-band activity entrains spiking units, as reported previously in other contexts<sup>55-57</sup>. We found that saccade onset significantly increases low-frequency spike-LFP phase locking (Figure 5C), as measured by pairwise phase consistency (PPC). These results indicate that saccade onset increases the strength of low-frequency population-level activity, which could in turn entrain the activity of local neurons.

## **A Computational Model Demonstrates that Activation of an Input Layer-Targeting Projection is Sufficient for Inducing Saccadic Suppression**

Given that input layer units exhibit significant changes in firing properties prior to saccade onset, we hypothesized that a projection targeting this layer could serve as the initiator of saccadic suppression within area V4. To determine whether such a projection would be sufficient for initiating suppression across all cortical layers, as well as to gain further insight into the associated circuit-level mechanisms, we developed a computational model of peri-saccadic activity changes within a cortical column. Our model draws inspiration from previous cortical circuit models that describe population-specific firing rate changes in response to the activation of an external input<sup>58</sup>. To simulate cortical circuit-level dynamics more faithfully, our model consists of six interconnected populations across three layers of the cortex (Figure 6A, left). Each cortical layer contains an excitatory (E) and inhibitory (I) population, which project to each other as well as to themselves. Given evidence of multiple operating regimes for a local E-I network in the visual cortex, connections within a layer were tuned to allow the local E-I network to switch in and out

of an inhibition-stabilized network (ISN) regime<sup>59,60</sup>: the baseline regime of the network is non-ISN, but direct external input to the E population switches it to ISN (see Methods; Figure S5A-C). Connections between layers exist in the form of projections from E neurons in the source layer to both E and I neurons in the target layer, with E-E and E-I connections tuned to affect a net increase in E activity in the target layer in response to an increase in E activity in the source layer. In our model, the input layer projects to the superficial layer, which then projects to the deep layer; this connectivity motif highlights the primary pathway for information flow within a visual cortical column<sup>13,61</sup>. Considering our empirical firing rate analysis, which found that both broad- and narrow-spiking units in the input layer show responses prior to saccade onset (Figure 3B), we chose to model the input layer as the primary recipient of the ‘saccadic signal’ input. We tuned the strength of the excitatory ‘saccadic signal’ pathway to the local E and I populations in this layer such that its activation affected a net suppression of the E activity.

In response to the activation of a saccadic signal of sufficient strength slightly before the time of saccade onset, the E input layer population rate was suppressed. In addition, our model simultaneously recapitulated our experimental findings in the input layer I population (enhancement), as well as the E/I populations in other layers (suppression) by virtue of the inter- and intra-layer connectivity (Figure 6B, S5B). Since local E activity is a major source of excitation to the I population within a layer, we next explored the role of the saccadic signal in sustaining input layer I activity despite a concurrent decline in local E activity. We explored three scenarios with saccadic signals of varying magnitudes ramping up and down over a fixed period (Figure 6C, top). We found that the increase in I activity in the input layer indeed depended on the strength of the saccadic signal and was sustained at sufficiently high magnitudes. Examination of the contribution of different excitatory pathways to the I population showed that sufficiently high

saccadic signal magnitude led to an increase in net excitation onto the I population that exceeded the loss in excitation resulting from the reduction of local E firing rates (Figure 6C, middle and bottom). Our model thus demonstrates that an input layer-specific saccadic signal of adequate strength can increase local I activity, which is sufficient for inducing suppression across the depth of the cortex. These findings correspond closely to our empirical observations. The model further predicted that the time course of the increase in input layer I activity was dependent on the baseline operating regime of the E-I network. When the network was robustly within the non-Isn regime, I activity increased immediately following saccadic signal onset. However, when the network was close to the switching point between the two regimes, the I activity showed little change below a saccadic signal of sufficient magnitude, even when the local E activity showed significant suppression (Figure S5E). This latter scenario corresponds closely to our empirical observations in the input layer (Figure 2B-C), suggesting that the baseline state of the cortical network lies close to the boundary between regimes.

Our experimental paradigm examined peri-saccadic neural activity in the absence of visual input. While this allowed us to investigate the cortical dynamics that are purely a result of the saccadic signal and avoid potential stimulus-induced artifacts in our recordings, it leaves open the question of how activity patterns may change in the presence of visual stimulation. To explore this further, we added a second external excitatory input (‘visual signal’) to the input layer E population (Figure 6A, right), which is the major target of feedforward visual input into V4<sup>14</sup>. The addition of this second input shifted the local E-I network into an Isn regime<sup>59</sup>, in which E and I activity increase or decrease concurrently. As a result, simultaneous activation of the visual signal led to a net reduction in the firing rate of both E and I input layer populations (Figure 6D, S5C). This produced a similar reduction in excitatory drive to the superficial and deep layers, where firing

275 was again suppressed. These results are consistent with prior reports of suppression from  
276 uncategorized neurons in the visual cortex in the presence of visual stimulation<sup>3,5,6</sup>.

# DISCUSSION

Our results provide evidence that the input layer of area V4 receives the earliest information about upcoming saccades. Units in the input layer showed changes in firing rate prior to saccade onset, while units in other layers did not. In addition, elevated spike-count correlations, a common byproduct of activating a shared input to a neural population<sup>62-65</sup>, were observed earliest among pairs of input layer neurons. Consistent with a single input source (i.e. projection) producing both phenomena, changes in the firing rate and correlational structure of input layer units were initiated with similar timing, approximately 40 ms before saccade onset. These convergent results indicate that the saccadic signaling pathway in question predominantly targets the input layer, which thereby allows us to infer its source. Given the lack of pre-saccadic modulation in the superficial and deep layers, it is unlikely that a projection from the FEF is responsible for the observed suppression. Likewise, it is doubtful that suppression is fed forward by projections from lower visual areas (V1/V2/V3), as such a mechanism would not explain the enhancement of narrow-spiking input layer firing rates in V4. Furthermore, to our knowledge, there have been no clear reports of saccadic suppression in V2 or V3, and while V1 is known to be suppressed during saccades, it does not exhibit pre-saccadic modulation<sup>26</sup>, and could therefore not be responsible for the changes in activity described here. Thus, we propose that saccadic suppression in V4 is likely initiated via the pulvinar, which sends projections to the input layer of V4<sup>23-25</sup>.

Several lines of evidence are consistent with this view. First, the pulvinar is known to be the target of highly organized projections from the superior colliculus<sup>66</sup>, which is a critical component of the saccadic initiation network<sup>67,68</sup>. Second, peri-saccadic modulation has been observed in the pulvinar of macaques, where neurons respond to saccades made in the dark without visual stimulation<sup>32,33</sup>. Neurons in the pulvinar of cats are able to distinguish between internally

generated saccades and simulated saccades produced with image motion, demonstrating that they encode the underlying motor command<sup>31</sup>. Lastly, the pulvinar is known to play a crucial role in spatial attention<sup>69-71</sup>, which is necessary for the proper execution of saccades towards target stimuli; indeed, temporary inactivation of the pulvinar produces significant deficits in saccadic target selection and execution<sup>72,73</sup>. Thus, pulvinar neurons encode the necessary information about saccadic motor planning to be able to provide a meaningful pre-saccadic signal to their efferent targets in the visual cortex.

We also found that narrow-spiking units in the input layer showed a peri-saccadic enhancement in firing. Narrow-spiking units are thought to correspond to parvalbumin-expressing (PV) inhibitory interneurons<sup>74,75</sup>, and input layer PV interneurons are known to receive strong and selective thalamocortical excitation.<sup>76-78</sup> This led us to speculate that an elevated level of inhibition within the input layer could suppress local excitatory neurons, as well as neurons in other cortical layers (Figure 6A). To explore this hypothesis, we developed a six-population firing rate model of the visual cortex and its modulation during saccades. The model demonstrated that pre-saccadic activation of an input layer-targeting projection is sufficient for suppressing signaling within a cortical column. A compelling aspect of our model is its simplicity – with straightforward inter-population connectivity rules, we were able to both replicate our empirical findings as well as reconcile the opposing patterns of activity observed in the input layer subpopulations. The model also reproduces trends in our experimental observations on the relative time course of broad and narrow spiking activity under a set of conditions wherein the input layer operates on the cusp of ISN and non-ISN operating regimes. Given these results, we propose that inhibitory input layer neurons initiate saccadic suppression and gate the processing of visual information entering the local cortical network.

We also observed increases in correlated activity across all cortical layers during saccades, in the form of elevated spike-count correlations, spike-spike coherence, low-frequency power, and low frequency spike-phase locking. Comparable increases in neural correlation have been associated with diminished stimulus sensitivity in multiple model organisms across a variety of sensory modalities<sup>50,79-82</sup>. This may be a result of heightened correlations functionally limiting the ability of a neural population to encode information, as suggested by previous experimental and theoretical work<sup>83-86</sup>. Similarly, saccadic suppression at the level of neurons and circuits is also accompanied by a behaviorally significant reduction in stimulus detection capabilities<sup>1,2</sup>, indicating that the increases in correlated variability reported here may reflect or contribute to that deficit.

To isolate the effects of the corollary discharge signal in initiating saccadic suppression, we chose to examine neurophysiological responses to saccades executed in the dark, a paradigm that has been employed extensively by previous studies<sup>6,31,87</sup>. Under these conditions, the time course of suppression that we observed was similar to reports of V4 activity during saccades made with visual stimulation<sup>6</sup>, suggesting that the saccadic signaling network remains intact in dark conditions. Our model demonstrates that a network regime change, which has been shown to occur when the cortical network is actively engaged in sensory processing<sup>59,60</sup>, can flip the modulation of the inhibitory input layer subpopulation in the presence of visual stimulation. This result is consistent with the lack of evidence for subpopulation-specific differences in modulation from previous studies employing cued saccade tasks. In summary, our study provides the first mechanistic understanding of peri-saccadic neural dynamics in a defined cortical circuit.



## ACKNOWLEDGEMENTS

This research was supported by NIH R01 EY021827 to JHR and ASN, NARSAD Young Investigator Grant, Ziegler Foundation Grant and Yale Orthwein Scholar Funds to ASN, NIH R00 EY025026 to MPJ, and by NEI core grants for vision research P30 EY019005 to the Salk Institute and P30 EY026878 to Yale University. We would like to thank Catherine Williams and Mat LeBlanc for excellent animal care.

## AUTHOR CONTRIBUTIONS

SD & ASN conceptualized the project. ASN collected the data and supervised the project. SD analyzed the data, with assistance from MPM and ASN. MPJ developed the computational model. SD, ASN, MPJ, and JHR wrote the manuscript.

## DECLARATION OF INTERESTS

The authors declare no competing interests.

# FIGURE LEGENDS

## Figure 1. Laminar Recordings and Saccade Identification

(A) The amplitude-velocity relationship ('main sequence') for all saccades ( $n = 4420$ ) in the dataset. An approximately linear trend is expected for saccades, as is found here ( $R^2 = 0.555$ ). dva = degrees of visual angle.

(B) Stacked contour plot showing spatial receptive fields (RFs) along the laminar probe from an example session. The RFs are well aligned, indicating perpendicular penetration down a cortical column. Zero depth represents the center of the input layer as estimated with current source density (CSD) analysis.

(C) CSD displayed as a colored map. The x-axis represents time from stimulus onset; the y-axis represents cortical depth. The CSD map has been spatially smoothed for visualization.

(D) Example of continuous eye-tracker and electrophysiological recordings. Eye traces are plotted at the top in grey. LFP traces are plotted by depth below, and spikes are overlaid on the corresponding channel. LFP traces have been color coded by layer identity; spikes have been color coded by cell type.

## Figure 2. Narrow-Spiking Input Layer Units Display Peri-Saccadic Enhancement of Firing

(A) Average peri-saccadic normalized firing rate for broad- ( $n = 102$  units) and narrow-spiking ( $n = 95$  units) populations. Thin lines indicate standard error of the mean.

(B) As in (A), but including only broad-spiking units from the superficial ( $n = 33$ ), input ( $n = 35$ ), and deep ( $n = 34$ ) layer populations.

(C) As in (A), but including only narrow-spiking units from the superficial ( $n = 25$  units), input ( $n = 24$  units), and deep ( $n = 46$  units) layer populations.

(D) Average peri-saccadic modulation index for the six neural subpopulations. Two-way ANOVA ( $F_{layer} = 1.16$ ,  $P = 0.3151$ ;  $F_{cell\ type} = 1.84$ ,  $P = 0.1765$ ;  $F_{interaction} = 5.98$ ,  $P = 0.0030$ ) with Tukey's multiple comparison tests (narrow-spiking superficial vs narrow-spiking input,  $*P = 0.0423$ ; narrow-spiking input vs narrow-spiking deep,  $*P = 0.0495$ ; narrow-spiking input vs broad-spiking input,  $**P = 0.0070$ ; narrow-spiking input vs broad-spiking deep,  $^{\#}P = 0.0817$ ). Error bars indicate standard error of the mean.

(E) Average peri-saccadic modulation index for positively modulated units from the six neural subpopulations. Two-way ANOVA ( $F_{layer} = 1.87$ ,  $P = 0.1666$ ;  $F_{cell\ type} = 2.32$ ,  $P = 0.1355$ ;  $F_{interaction} = 5.51$ ,  $P = 0.0077$ ) with Tukey's multiple comparison tests (narrow-spiking superficial vs narrow-spiking input,  $^{\#}P = 0.0833$ ; narrow-spiking input vs narrow-spiking deep,  $**P = 0.0073$ ; narrow-spiking input vs broad-spiking input,  $*P = 0.0106$ ; narrow-spiking input vs broad-spiking deep,  $*P = 0.0384$ ). Error bars indicate standard error of the mean.

(F) Proportion of units in each neural subpopulation with a positive peri-saccadic modulation index.

### Figure 3. Input Layer Units Display Modulation Prior to Saccade Onset

(A) Six example single-units demonstrating the approach for identifying the time of significant peri-saccadic firing rate modulation. 95% confidence intervals were calculated for the baseline activity of each unit (dashed grey lines) and the first deviation outside of those bounds was marked as the time of first significant response (red line). The example units shown are the same as those from Figure S1B.

(B) Average timing of first significant peri-saccadic modulation for the six neural subpopulations. Input layer units, both broad- and narrow-spiking, show modulation prior to saccade onset. Two-

tailed one-sample t-test (broad-spiking input layer,  $**P = 0.0049$ ; narrow-spiking input layer,  $*P = 0.0492$ ). Error bars indicate standard error of the mean.

# **Figure 4. Saccade Onset Increases Correlated Variability Most Prominently in the Input Layer**

(A) Spike count correlations as a function of time relative to saccade onset for input-input unit pairs ( $n = 240$  pairs). Correlations were calculated with a sliding 201 ms window. Thin lines indicate bootstrapped 95% confidence intervals.

(B) Average start time of spike count correlation rise relative to saccade onset. Y-axis labels indicate layer identity of unit pairs (S - superficial; I - input; D - deep). Error bars represent bootstrapped 95% confidence intervals. Input-input pairs begin to rise before saccade onset and before all other pair combinations. All other pairs respond after saccade onset.

(C) Average spike-spike coherence between pairs of simultaneously recorded units (single-units and multi-units) before (-200 to 0 ms) and after (0 to 200 ms) saccade onset as a function of frequency. Superficial layer,  $n = 299$  pairs; input layer,  $n = 191$  pairs; deep layer,  $n = 604$  pairs. Thin lines indicate standard error of the mean. Dashed lines indicate spike-spike coherence for shuffled data.

(D) Same data as in (C), but averaged across three frequency bands and plotted as a modulation index:  $(SSC_{\text{after}} - SSC_{\text{before}})/(SSC_{\text{after}} + SSC_{\text{before}})$ . Two-tailed one-sample t-tests (Superficial 0-12 Hz,  $***P = 1.64 \times 10^{-10}$ ; Superficial 15-25 Hz,  $**P = 0.0027$ ; Superficial 30-100 Hz,  $P = 0.5468$ ; Input 0-12 Hz,  $***P = 2.2131 \times 10^{-7}$ ; Input 15-25 Hz,  $***P = 5.5458 \times 10^{-4}$ ; Input 30-100 Hz,  $***P = 1.6503 \times 10^{-5}$ ; Deep 0-12 Hz,  $**P = 0.0013$ ; Deep 15-25 Hz,  $*P = 0.0116$ ; Deep 30-100 Hz,  $**P = 0.0050$ ). Error bars indicate standard error of the mean.

## Figure 5. Saccade Onset Increases Low Frequency Power and Spike-LFP Locking

(A) Time-frequency representation (spectrogram) of LFP power around saccade onset. Signal strength is represented as percent change in power (i.e. the raw power at each timepoint is divided by the average power in the baseline period, defined here as 250 to 150 ms before saccade onset).

(B) Top: Average power spectra before (-200 to 0 ms) and after (0 to 200 ms) saccade onset. Thin lines indicate standard error of the mean. Bottom: Same data as in top, but averaged across three frequency bands and normalized to data before saccade onset for visualization. Two tailed paired-sample t-tests (0-12 Hz,  $***P = 3.4669 \times 10^{-92}$ ; 15-25 Hz,  $***P = 9.3690 \times 10^{-74}$ ; 30-100 Hz,  $***P = 2.7322 \times 10^{-9}$ ). Error bars indicate standard error of the mean.

(C) Top: Average spike-LFP locking spectra before (-200 to 0 ms) and after (0 to 200 ms) saccade onset. Thin lines indicate standard error of the mean. Bottom: Same data as in top, but averaged across three frequency bands. Two tailed paired-sample t-tests (0-12 Hz,  $***P = 1.7147 \times 10^{-19}$ ; 15-25 Hz,  $P = 0.1598$ ; 30-100 Hz,  $P = 0.1091$ ). Error bars indicate standard error of the mean.

## Figure 6. A Computational Model Confirms that Activation of an Input Layer-Targeting Projection Induces Saccadic Suppression

(A) Connectivity between populations in our computational model. Excitatory (E) and inhibitory (I) populations within each layer project to each other as well as themselves. The input layer excitatory population projects to the superficial layer, while the superficial excitatory population projects to the deep layer. In our model of spontaneous saccades (left), we activate an external excitatory projection that selectively targets the input layer. In our model of saccades executed in

the presence of visual stimuli (right), we add an additional input that selectively targets input layer excitatory neurons.

(B) Normalized peri-saccadic firing rate of simulated neural subpopulations during spontaneously executed saccades ( $n = 110$  simulated saccades). The input layer inhibitory subpopulation shows enhancement of firing, while all other subpopulations show suppression.

(C) Further dissection of input layer activity. (Top) The saccadic signal arriving in the input layer was simulated with a ramping function. Represented here are saccadic signals of three different strengths. From weakest to strongest, these are represented by dotted, continuous, and dashed lines, both here and in the following subpanels. (Middle) The excitatory and inhibitory input layer subpopulation firing rates in response to three saccadic signals of varying strength. (Bottom) Net excitatory drive onto the inhibitory input layer subpopulation in response to three saccadic signals of varying strength. The excitatory drive is the sum of drive from the external saccadic input and drive from the local excitatory population.

(D) Normalized peri-saccadic firing rate of simulated neural subpopulations during saccades executed in the presence of visual stimulation ( $n = 102$  simulated saccades). Visual stimulation is represented by the activation of a second input, which selectively targets the input layer excitatory subpopulation. Here, all subpopulations within the cortical column show peri-saccadic suppression.

# **Figure S1. Peri-Saccadic Single-Unit Firing Rate Estimation**

(A) Spontaneous firing rates of each neural subpopulation.

(B) Peri-saccadic single-unit firing rates were estimated by smoothing individual spikes with gaussian kernels. The kernel bandwidth was selected for each unit at each point in time using an

optimization algorithm that minimizes the mean integrated squared error<sup>45</sup>. The firing rate estimates produced by this approach are shown for six representative example units, one from each recorded neural subpopulation. The smoothed firing rates (black) are overlaid on the raster plots showing raw spikes (blue). In the raster plot, each row represents a single saccade. Thin lines are bootstrapped 95% confidence intervals of the firing rate estimate.

## **Figure S2. Additional Narrow-Spiking Input Layer Single-Unit Examples**

Additional example narrow-spiking input layer single-units that display peri-saccadic enhancement of firing. Firing rates were estimated using a kernel smoothing approach and bandwidth optimization algorithm<sup>45</sup>. The smoothed firing rates (black) are overlaid on the spike raster plots (blue). Thin lines are bootstrapped 95% confidence intervals of the firing rate estimate.

## **Figure S3. Single-Unit Modulation Indices**

Single-unit modulation indices as a function of spike waveform duration. Neural populations from each layer are displayed in different subplots. The dashed horizontal line represents a modulation index of zero (no firing rate change), while the dashed vertical line represents the threshold separating narrow- and broad- spiking units.

## **Figure S4. Input Layer Pairs Show Increases in Spike Count Correlations Prior to Saccade Onset**

(A) Spike count correlations as a function of time relative to saccade onset for all combinations of layer-wise unit pairs. Superficial-superficial,  $n = 442$  pairs; superficial-input,  $n = 558$  pairs; superficial-deep,  $n = 755$  pairs; input-input,  $n = 240$  pairs; input-deep,  $n = 501$  pairs; deep-deep,  $n$

= 680 pairs. Correlations were calculated with a sliding 201 ms window. Thin lines indicate bootstrapped 95% confidence intervals.

(B) Normalized pupil diameter around the time of saccade onset ( $n = 4420$  saccades). Thin lines indicate standard error of the mean.

# **Figure S5. Phase Plane Analysis of the Input Layer E-I System**

(A) The E-I network in the input layer.

(B) The nullclines and stable activity levels of the input layer E and I populations during simulation of spontaneous activity. Equations and parameters are the same as those described in the Methods and used in Figure 6. The orange and blue curves show the E and I nullclines, respectively, of the E-I network in (A). Each point on a nullcline indicates the steady state firing rate of the E or I population when the activity of the other population is fixed, i.e. the rate of change in equations (3) or (4) is zero. The ISN and non-ISN regimes of the network are demarcated by the switch between positive and negative slopes along the E nullclines. This ability to switch is a consequence of strong E-E connectivity, and is absent when the E-E connectivity strength is either weak or zero. The thin nullclines depict firing rates when saccadic input is at baseline; the thick nullclines depict firing rates when saccadic input increases by a non-zero value. The intersections of the E and I nullclines indicate the steady state firing rates at which the network stabilizes if allowed to seek equilibrium (indicated by black and pink dots at baseline and during peak saccadic suppression, respectively). As illustrated here, the nullclines for our model intersect in the non-ISN regime in the absence of visual input, causing E and I activity to shift in opposite directions in response to the saccadic signal.



(C) Same as in (B), but during simulated visual stimulation. The addition of excitatory input to the E population shifts the E nullclines to the right, causing them to intersect with the I nullclines in the ISN regime. As illustrated here, this causes the E and I populations to shift in the same direction in response to the saccadic signal.

(D) The approximate level of saccadic signal strength that corresponds to the E (orange) and I (blue) nullcline sets shown in (B) and (C). The phase plane analysis is most applicable to constant levels of saccadic signal, and is only an approximate depiction of the scenario of a ramp signal shown in (D), and as used in the model simulation in Figure 6.

(E) Effect of E-E connection strength on inhibitory firing rate changes in response to the saccadic signal. Each set of E nullclines corresponds to a given E-E connection strength ( $W_{EE}$ ), and illustrates the effects of raising saccadic signal magnitude (indicated by greater line thickness), causing either increases or decreases in steady state firing rates (black dots), as determined by their intersection with the I nullclines. This phase plane analysis approximately predicts three ways in which I firing rate can shift in response to increasing saccadic input: 1) it increases quickly in response to a small increase in saccadic signal ( $W_{EEA}$ ), 2) it increases minimally until a threshold level of saccadic signal is reached ( $W_{EEB}$ ), or 3) it first decreases then increases with rising saccadic signal strength ( $W_{EEC}$ ). The operating regime shown in the simulation results (Figure 6) that recapitulate experimental observations corresponds to the E-E connection strength illustrated by  $W_{EEB}$ . In this case, the network is maintained at the boundary between ISN (positive E nullcline slope) and non-ISN (negative E nullcline slope) regimes in the absence of the saccadic signal.

# **METHODS**

## **Surgical Procedures**

Surgical procedures have been described in detail previously<sup>88,89</sup>. In brief, an MRI-compatible, low-profile titanium chamber was placed over the pre-lunate gyrus on the basis of preoperative MRI imaging in two rhesus macaques (right hemisphere in monkey A, left hemisphere in monkey C). The native dura mater was then removed, and a silicone-based, optically clear artificial dura (AD) was inserted, resulting in an optical window over dorsal V4. All procedures were approved by the Institutional Animal Care and Use Committee and conformed to NIH guidelines.

## **Electrophysiology**

At the beginning of each recording session, a plastic insert with an opening for targeting electrodes was lowered into the chamber and secured. This served to stabilize the recording site against cardiac pulsations. Neurons were recorded from cortical columns in dorsal V4 using 16-channel linear array electrodes (“laminar probes”; Plexon, Plexon V-probe). The laminar probes were mounted on adjustable x-y stages attached to the recording chamber and positioned over the center of the pre-lunate gyrus under visual guidance through a microscope (Zeiss). This ensured that the probes were maximally perpendicular to the surface of the cortex and thus had the best possible trajectory to make a normal penetration down a cortical column. Across recording sessions, the probes were positioned over different sites along the center of the gyrus in the parafoveal region of V4 with receptive field eccentricities between 2 and 7 degrees of visual angle. Care was taken to target cortical sites with no surface micro-vasculature and, in fact, the surface micro-vasculature was used as reference so that the same cortical site was not targeted across recording sessions. The probes were advanced using a hydraulic microdrive (Narishige) to first

penetrate the AD and then through the cortex under microscopic visual guidance. Probes were advanced until the point that the top-most electrode (toward the pial surface) registered LFP signals. At this point, the probe was retracted by about 100–200  $\mu$ m to ease the dimpling of the cortex due to the penetration. This procedure greatly increased the stability of the recordings and also increased the neuronal yield in the superficial electrodes.

The distance from the tip of the probes to the first electrode contact was either 300  $\mu$ m or 700  $\mu$ m. The inter-electrode distance was 150  $\mu$ m, thus negating the possibility of recording the same neural spikes in adjacent recording channels. Neuronal signals were recorded extracellularly, filtered, and stored using the Multi-channel Acquisition Processor system (Plexon). Neuronal signals were classified as either multi-unit clusters or isolated single-units using the Plexon Offline Sorter program. Single-units were identified based on two criteria: (1) if they formed an identifiable cluster, separate from noise and other units, when projected into the principal components of waveforms recorded on that electrode and (2) if the inter-spike interval (ISI) distribution had a well-defined refractory period. Single-units were classified as either narrow-spiking (putative interneurons) or broad-spiking (putative pyramidal cells) based on methods described in detail previously<sup>41</sup>. Specifically, only units with waveforms having a clearly defined peak preceded by a trough were potential candidates. Units with trough-to-peak duration less than 225 ms were classified as narrow-spiking units; units with trough- to-peak duration greater than 225 ms were classified as broad-spiking units.

Data were collected over 17 sessions (8 sessions in monkey A and 9 in monkey C), yielding a total of 211 single-units (99 narrow-spiking, 112 broad-spiking) and 110 multi-unit clusters.

## **Recording**

Stimuli were presented on a computer monitor placed 57 cm from the eye. Eye position was continuously monitored with an infrared eye tracking system (ISCAN ETL-200). Trials were aborted if eye position deviated more than 1 degree of visual angle from fixation. Experimental control was handled by NIMH Cortex software (<http://www.cortex.salk.edu/>).

### ***Receptive Field Mapping***

At the beginning of each recording session, neuronal RFs were mapped using subspace reverse correlation in which Gabor (eight orientations, 80% luminance contrast, spatial frequency 1.2 cycles/degree, Gaussian half-width 2 degrees) or ring (80% luminance contrast) stimuli appeared at 60 Hz while monkeys fixated. Each stimulus appeared at a random location selected from an 11 x 11 grid with 1 degree spacing in the appropriate visual quadrant. Spatial receptive maps were obtained by applying reverse correlation to the evoked LFP signal at each recording site. For each spatial location in the 11 x 11 grid, we calculated the time-averaged power in the stimulus-evoked LFP (0–200 ms after each stimulus flash) at each recording site. The resulting spatial map of LFP power was taken as the spatial RF at the recording site. For the purpose of visualization, the spatial RF maps were smoothed using spline interpolation and displayed as stacked contours plots of the smoothed maps (Figure 1B). All RFs were in the lower visual quadrant (lower left in monkey A and lower right in monkey C) and with eccentricities between 2 and 7 degrees of visual angle.

### ***Current Source Density Mapping***

In order to estimate the laminar identity of each recording channel, we used a CSD mapping procedure<sup>39</sup>. Monkeys maintained fixation while 100% luminance contrast ring stimuli were flashed (30 ms), centered at the estimated RF overlap region across all channels. The size of the ring was scaled to about three-quarters of the estimated diameter of the RF. CSD was calculated

as the second spatial derivative of the flash-triggered LFPs. The resulting time-varying traces of current across the cortical layers can be visualized as CSD maps (Figure 1C). Red regions depict current sinks in the corresponding region of the cortical laminae; blue regions depict current sources. The input layer (Layer 4) was identified as the first current sink followed by a reversal to current source. The superficial (Layers 1–3) and deep (Layers 5 and 6) layers had opposite sink-source patterns. LFPs and spikes from the corresponding recording channels were then assigned to one of three layers: superficial, input, or deep.

### *Spontaneous Recordings*

In the main experiment, all monitors and lights were turned off in the recording room and adjacent control room to ensure that the environment was as dark as experimentally feasible. Luminance inside the recording chamber was less than  $9 \times 10^{-4}$  cd/m<sup>2</sup> (SpectraScan PR 701S, Photo Research). Eye tracker and electrophysiological data were recorded while the animals executed eye-movements freely in the dark.

## **Data Analysis**

### *Saccade Identification*

To identify saccade onset and offset times from the raw eye-tracker data, we used the Cluster Fix algorithm<sup>90</sup>. Cluster Fix performs k-means clustering on four parameters (distance, velocity, acceleration, and angular velocity) to find natural partitions in the eye-tracker data and identify saccades. To ensure that our set of identified eye movements was ‘clean,’ we imposed several additional criteria: 1) to avoid adjacent saccades affecting our analysis, we only considered saccades separated from neighboring saccades by at least 500 ms, 2) to exclude microsaccades, we only considered saccades that were greater in amplitude than 0.7 degrees of visual angle, 3) to exclude slower eye movements that Cluster Fix had mislabeled as saccades, we only considered

eye movements less than 200 ms in duration, and 4) to exclude periods of data erroneously labeled as saccades due to blinking or drowsiness, we identified those periods using pupil diameter measurements and excluded nearby saccades.

Saccadic eye movements are known to have an approximately linear relationship between amplitude and peak velocity that is referred to as the main sequence<sup>38</sup>. To ensure that our approach identified a set of eye movements that quantitatively resembled the properties of saccades, we calculated the amplitude and peak velocity for each of the identified eye movements and found an approximately linear relationship (Figure 1A).

### ***Firing Rate Estimation and Modulation Index***

To estimate the peri-saccadic firing rate, spikes were extracted for each saccade beginning 500 ms prior to saccade onset and ending 500 ms after saccade onset. To obtain a continuous estimate of the firing rate, each spike was convolved with a gaussian kernel and the average firing rate across saccades was calculated for each unit (Figure S1B; Figure S2). The kernel bandwidth was selected on a unit-by-unit basis at each point in time using a bandwidth optimization algorithm that minimized the mean integrated squared error<sup>45</sup>. In order to obtain reliable firing rate estimates, only units that fired at least 75 spikes within 500 ms of saccade onset (before or after) were included.

A modulation index was calculated for each unit to estimate the degree to which their activity deviated from baseline following saccade onset (Figure 2D, E; Figure S3). The modulation index was defined as  $FR_s/FR_b - 1$ , where  $FR_s$  is the maximum firing rate in the 200 ms after saccade onset and  $FR_b$  is the baseline firing rate of the unit, calculated by averaging the firing rate for each unit in a time window 350 to 250 ms before saccade onset.

### ***Spike Count Correlations***

To obtain a continuous estimate of spike count correlations, we calculated the Pearson correlation of spike counts across saccades at each time bin for every pair of simultaneously recorded single- and multi-units (Figure 4A, Figure S4A). The window was 201 ms centered in time and was shifted by 1 ms steps. Spike counts were z-scored to control for firing rate differences across time. Traces were smoothed with a 101 ms Gaussian weighted moving average. To perform the timing analysis, we took the local minimum in correlation as the time at which the rise begins. Bootstrapping was performed for each pair type to obtain confidence intervals on the estimate (Figure 4B).

### ***Spike-Spike Coherence***

We computed the coherence between simultaneously recorded, multi-unit pairs within a cortical layer using multi-taper methods<sup>91</sup> for two different windows: the 200 ms before and after saccade onset (Figure 4C). Spike trains were tapered with a single Slepian taper (TW = 3, K = 5). Magnitude of coherence estimates depend on the number of spikes used to create the estimates<sup>92</sup>. To control for differences in firing rate across the two windows, we adopted a rate-matching procedure<sup>53</sup>. In order to obtain a baseline for the coherence expected solely due to trends in firing time-locked to saccade onset, we also computed coherence in which saccade identities were randomly shuffled. Only units that elicited at least 50 spikes from each neuron cumulatively across all saccades in both time windows were considered. A modulation index, defined as  $(SSC_{after} - SSC_{before}) / (SSC_{after} + SSC_{before})$ , was calculated for each pair of units at each frequency band (Figure 4D).

### ***Power***

Local field potential power was calculated with multi-tapered methods<sup>91</sup>. Signals were tapered with a single Slepian taper (TW = 3, K = 5). Spectrograms (Figure 5A) were generated by

sliding a 201 ms window by increments of 1 ms. Power spectra before (-200 to 0 ms) and after (0 to 200 ms) saccade onset were calculated with static variants of the same methods (Figure 5B). No layer-specific differences were found, so results shown here are averaged across all recording channels.

### ***Pairwise Phase Consistency***

The pairwise phase consistency (PPC) is an estimate of spike-field locking that is not biased by spike count or firing rate<sup>93</sup>. Two segments of data were analyzed: the 200 ms before and after saccade onset. In order to obtain reliable estimates, only units that fired at least 50 spikes cumulatively across all saccades during both time windows were considered. The spectro-temporal representation of the local field potential signal was generated through a continuous wavelet transform with a family of complex Morlet wavelets (spanning frequencies from 2 to 100 Hz, with 6 cycles at each frequency). Phase information was extracted at the time of each spike, and the PPC was then calculated for each unit with each LFP channel in the laminar probes (Figure 5C). We observed minimal change in the PPC as a function of LFP layer, so the results presented here were averaged across all recording channels.

### ***Computational Model***

The firing rate or mean field model consists of a network of six populations representing excitatory (E) and inhibitory (I) populations in the superficial (L1), input (L2), and deep (L3) layers of the cortex. The firing rate model describes temporal changes in the firing rates ( $r$ ) of each population as a function of the activity of two external inputs ( $i_{sacc}$ , the saccadic signal, and  $i_{stim}$ , the visual signal) and the activity of other populations in the network. The connectivity between populations is depicted in Figure 6A. The network consists of a coupled E-I network in each layer and captures the core aspect of connectivity between cortical layers: information flow from input



to superficial to deep layer. The saccadic signal is sent to both E and I populations in the input layer, while the visual signal is sent only to the E population in the input layer. The saccadic signal is described by a ramping function (Figure 6C, top). The visual signal is only activated in the second set of simulations, where it is held constant to replicate sustained visual input. The six-population rate model is described by the following equations:

$$\tau_E \frac{dr_{EL1}}{dt} = -r_{EL1} + G_E(W_{EE} \cdot r_{EL1} - W_{EI} \cdot r_{IL1} + W_{EEL12} \cdot r_{EL2}) \quad (1)$$

$$\tau_I \frac{dr_{IL1}}{dt} = -r_{IL1} + G_I(W_{IE} \cdot r_{EL1} - W_{II} \cdot r_{IL1} + W_{IEL12} \cdot r_{EL2}) \quad (2)$$

$$\tau_E \frac{dr_{EL2}}{dt} = -r_{EL2} + G_E(W_{EE} \cdot r_{EL2} - W_{EI} \cdot r_{IL2} + W_{EESS} \cdot i_{sacc} + i_{stim}) \quad (3)$$

$$\tau_I \frac{dr_{IL2}}{dt} = -r_{IL2} + G_I(W_{IE} \cdot r_{EL2} - W_{II} \cdot r_{IL2} + W_{IESS} \cdot i_{sacc}) \quad (4)$$

$$\tau_E \frac{dr_{EL3}}{dt} = -r_{EL3} + G_E(W_{EE} \cdot r_{EL3} - W_{EI} \cdot r_{IL3} + W_{EEL32} \cdot r_{EL1}) \quad (5)$$

$$\tau_I \frac{dr_{IL3}}{dt} = -r_{IL3} + G_I(W_{IE} \cdot r_{EL3} - W_{II} \cdot r_{IL3} + W_{IEL32} \cdot r_{EL1}) \quad (6)$$

$$G(x) = \begin{cases} 0 & \text{for } x < \theta \\ m(x - \theta)^{2.5} & \text{for } \theta < x < \theta + 1/m \\ 1 & \text{for } x > \theta + 1/m \end{cases} \quad (7)$$

$\tau_E$  and  $\tau_I$  are the rates at which the excitatory and inhibitory populations approach their steady states.  $G_E$  and  $G_I$  are the population response functions, described by equation (7), for the excitatory and inhibitory populations that transform the given inputs into a firing response.  $\theta$  is the threshold input and  $m$  is the rate of the response function. Parameters tuned in the model to recapitulate the population level observations in experimental data:  $W_{EE} = 25$ ,  $W_{II} = 4$ ,  $W_{EI} = 25$ ,  $W_{IE} = 20$ ,  $W_{EEL12} = 20$ ,  $W_{IEL12} = 2$ ,  $W_{EESS} = 0.5$ ,  $W_{IESS} = 3$ ,  $W_{EEL32} = 30$ ,  $W_{IEL32} = 4$ ,  $\tau_E =$

$$0.008, \tau_I = 0.004, m_E = 0.001, m_I = 0.005, \theta_{E_{L1}} = -3, \theta_{E_{L2}} = -5, \theta_{E_{L3}} = -5, \theta_{I_{L1}} = 0, \\ \theta_{I_{L2}} = 8, \theta_{I_{L3}} = 8, i_{stim} = 10.$$

A further tuning was applied to the model to switch each E-I population between an inhibitory stabilized network (ISN) regime and a non-ISN one<sup>60</sup>. Experimental data from visual cortex suggest that a cortical network switches to an ISN regime during stimulus processing<sup>59</sup>, hence we included this feature to generate model predictions for saccadic suppression-related laminar activity during stimulus presentation. Previous modeling work has shown that a firing-rate E-I network model can switch between these regimes either by modification of connection weights ( $W$ ), change in slope or rate of response functions ( $m$ ) or a combination of both<sup>60</sup>. We implemented the simplest mechanism for the network to switch between ISN and non-ISN regime: nonlinear response functions. When visual stimulation (modeled as an excitatory input to the input layer E population) is applied to the model cortical column, the network moves to a higher slope region of its response functions, and switches to the ISN operating regime. A phase-plane analysis of the E-I network model illustrates how this results in a distinct response of the network to exactly the same saccadic signal input (Figure S5).

# REFERENCES

- 1     Matin, E. Saccadic suppression: a review and an analysis. *Psychol Bull* **81**, 899-917, doi:10.1037/h0037368 (1974).
- 2     Zuber, B. L. & Stark, L. Saccadic suppression: elevation of visual threshold associated with saccadic eye movements. *Exp Neurol* **16**, 65-79, doi:10.1016/0014-4886(66)90087-2 (1966).
- 3     Thiele, A., Henning, P., Kubischik, M. & Hoffmann, K. P. Neural mechanisms of saccadic suppression. *Science* **295**, 2460-2462, doi:10.1126/science.1068788 (2002).
- 4     Kleiser, R., Seitz, R. J. & Krekelberg, B. Neural correlates of saccadic suppression in humans. *Curr Biol* **14**, 386-390, doi:10.1016/j.cub.2004.02.036 (2004).
- 5     Bremmer, F., Kubischik, M., Hoffmann, K. P. & Krekelberg, B. Neural dynamics of saccadic suppression. *J Neurosci* **29**, 12374-12383, doi:10.1523/JNEUROSCI.2908-09.2009 (2009).
- 6     Zanos, T. P., Mineault, P. J., Guitton, D. & Pack, C. C. Mechanisms of Saccadic Suppression in Primate Cortical Area V4. *J Neurosci* **36**, 9227-9239, doi:10.1523/JNEUROSCI.1015-16.2016 (2016).
- 7     Wurtz, R. H., Joiner, W. M. & Berman, R. A. Neuronal mechanisms for visual stability: progress and problems. *Philos Trans R Soc Lond B Biol Sci* **366**, 492-503, doi:10.1098/rstb.2010.0186 (2011).
- 8     Sommer, M. A. & Wurtz, R. H. A pathway in primate brain for internal monitoring of movements. *Science* **296**, 1480-1482, doi:10.1126/science.1069590 (2002).
- 9     Sommer, M. A. & Wurtz, R. H. Influence of the thalamus on spatial visual processing in frontal cortex. *Nature* **444**, 374-377, doi:10.1038/nature05279 (2006).
- 10    Roe, A. W. *et al.* Toward a unified theory of visual area V4. *Neuron* **74**, 12-29, doi:10.1016/j.neuron.2012.03.011 (2012).
- 11    Han, X., Xian, S. X. & Moore, T. Dynamic sensitivity of area V4 neurons during saccade preparation. *Proc Natl Acad Sci U S A* **106**, 13046-13051, doi:10.1073/pnas.0902412106 (2009).
- 12    Hirsch, J. A. & Martinez, L. M. Laminar processing in the visual cortical column. *Curr Opin Neurobiol* **16**, 377-384, doi:10.1016/j.conb.2006.06.014 (2006).
- 13    Douglas, R. J. & Martin, K. A. Neuronal circuits of the neocortex. *Annu Rev Neurosci* **27**, 419-451, doi:10.1146/annurev.neuro.27.070203.144152 (2004).
- 14    Felleman, D. J. & Van Essen, D. C. in *Cereb cortex*. (Citeseer).

- 767 15 Ungerleider, L. G., Galkin, T. W., Desimone, R. & Gattass, R. Cortical connections of area  
768 V4 in the macaque. *Cereb Cortex* **18**, 477-499, doi:10.1093/cercor/bhm061 (2008).
- 769 16 Rockland, K. S. & Pandya, D. N. Laminar origins and terminations of cortical connections  
770 of the occipital lobe in the rhesus monkey. *Brain Res* **179**, 3-20, doi:10.1016/0006-  
771 8993(79)90485-2 (1979).
- 772 17 Boussaoud, D., Ungerleider, L. G. & Desimone, R. Pathways for motion analysis: cortical  
773 connections of the medial superior temporal and fundus of the superior temporal visual  
774 areas in the macaque. *J Comp Neurol* **296**, 462-495, doi:10.1002/cne.902960311 (1990).
- 775 18 Distler, C., Boussaoud, D., Desimone, R. & Ungerleider, L. G. Cortical connections of  
776 inferior temporal area TEO in macaque monkeys. *J Comp Neurol* **334**, 125-150,  
777 doi:10.1002/cne.903340111 (1993).
- 778 19 Borra, E., Ichinohe, N., Sato, T., Tanifuji, M. & Rockland, K. S. Cortical connections to  
779 area TE in monkey: hybrid modular and distributed organization. *Cereb Cortex* **20**, 257-  
780 270, doi:10.1093/cercor/bhp096 (2010).
- 781 20 Gattass, R., Galkin, T. W., Desimone, R. & Ungerleider, L. G. Subcortical connections of  
782 area V4 in the macaque. *J Comp Neurol* **522**, 1941-1965, doi:10.1002/cne.23513 (2014).
- 783 21 Anderson, J. C., Kennedy, H. & Martin, K. A. Pathways of attention: synaptic relationships  
784 of frontal eye field to V4, lateral intraparietal cortex, and area 46 in macaque monkey. *J*  
785 *Neurosci* **31**, 10872-10881, doi:10.1523/JNEUROSCI.0622-11.2011 (2011).
- 786 22 Stanton, G. B., Bruce, C. J. & Goldberg, M. E. Topography of projections to posterior  
787 cortical areas from the macaque frontal eye fields. *J Comp Neurol* **353**, 291-305,  
788 doi:10.1002/cne.903530210 (1995).
- 789 23 Benevento, L. A. & Rezak, M. The cortical projections of the inferior pulvinar and adjacent  
790 lateral pulvinar in the rhesus monkey (*Macaca mulatta*): an autoradiographic study. *Brain*  
791 *Res* **108**, 1-24, doi:10.1016/0006-8993(76)90160-8 (1976).
- 792 24 Shipp, S. The functional logic of cortico-pulvinar connections. *Philos Trans R Soc Lond B*  
793 *Biol Sci* **358**, 1605-1624, doi:10.1098/rstb.2002.1213 (2003).
- 794 25 Rockland, K. S. Distinctive Spatial and Laminar Organization of Single Axons from  
795 Lateral Pulvinar in the Macaque. *Vision* **4**, 1 (2020).
- 796 26 McFarland, J. M., Bondy, A. G., Saunders, R. C., Cumming, B. G. & Butts, D. A. Saccadic  
797 modulation of stimulus processing in primary visual cortex. *Nat Commun* **6**, 8110,  
798 doi:10.1038/ncomms9110 (2015).
- 799 27 Wurtz, R. H. Response of striate cortex neurons to stimuli during rapid eye movements in  
800 the monkey. *J Neurophysiol* **32**, 975-986, doi:10.1152/jn.1969.32.6.975 (1969).

- 801 28 Bizzi, E. Discharge of frontal eye field neurons during saccadic and following eye  
802 movements in unanesthetized monkeys. *Exp Brain Res* **6**, 69-80, doi:10.1007/BF00235447  
803 (1968).
- 804 29 Schall, J. D. & Hanes, D. P. Neural basis of saccade target selection in frontal eye field  
805 during visual search. *Nature* **366**, 467-469, doi:10.1038/366467a0 (1993).
- 806 30 Everling, S. & Munoz, D. P. Neuronal correlates for preparatory set associated with pro-  
807 saccades and anti-saccades in the primate frontal eye field. *J Neurosci* **20**, 387-400 (2000).
- 808 31 Robinson, D. L., McClurkin, J. W., Kertzman, C. & Petersen, S. E. Visual responses of  
809 pulvinar and collicular neurons during eye movements of awake, trained macaques. *J*  
810 *Neurophysiol* **66**, 485-496, doi:10.1152/jn.1991.66.2.485 (1991).
- 811 32 Berman, R. A. & Wurtz, R. H. Signals conveyed in the pulvinar pathway from superior  
812 colliculus to cortical area MT. *J Neurosci* **31**, 373-384, doi:10.1523/JNEUROSCI.4738-  
813 10.2011 (2011).
- 814 33 Sudkamp, S. & Schmidt, M. Response characteristics of neurons in the pulvinar of awake  
815 cats to saccades and to visual stimulation. *Exp Brain Res* **133**, 209-218,  
816 doi:10.1007/s002210000374 (2000).
- 817 34 Katzner, S., Busse, L. & Carandini, M. GABAA inhibition controls response gain in visual  
818 cortex. *J Neurosci* **31**, 5931-5941, doi:10.1523/JNEUROSCI.5753-10.2011 (2011).
- 819 35 Wilson, N. R., Runyan, C. A., Wang, F. L. & Sur, M. Division and subtraction by distinct  
820 cortical inhibitory networks in vivo. *Nature* **488**, 343-348, doi:10.1038/nature11347  
821 (2012).
- 822 36 Mitchell, S. J. & Silver, R. A. Shunting inhibition modulates neuronal gain during synaptic  
823 excitation. *Neuron* **38**, 433-445, doi:10.1016/s0896-6273(03)00200-9 (2003).
- 824 37 Berman, R. A., Cavanaugh, J., McAlonan, K. & Wurtz, R. H. A circuit for saccadic  
825 suppression in the primate brain. *J Neurophysiol* **117**, 1720-1735,  
826 doi:10.1152/jn.00679.2016 (2017).
- 827 38 Bahill, A. T., Clark, M. R. & Stark, L. The main sequence, a tool for studying human eye  
828 movements. *Mathematical Biosciences* **24**, 191-204 (1975).
- 829 39 Mitzdorf, U. Current source-density method and application in cat cerebral cortex:  
830 investigation of evoked potentials and EEG phenomena. *Physiol Rev* **65**, 37-100,  
831 doi:10.1152/physrev.1985.65.1.37 (1985).
- 832 40 Nandy, A. S., Nassi, J. J. & Reynolds, J. H. Laminar Organization of Attentional  
833 Modulation in Macaque Visual Area V4. *Neuron* **93**, 235-246,  
834 doi:10.1016/j.neuron.2016.11.029 (2017).

- 835 41 Mitchell, J. F., Sundberg, K. A. & Reynolds, J. H. Differential attention-dependent  
836 response modulation across cell classes in macaque visual area V4. *Neuron* **55**, 131-141,  
837 doi:10.1016/j.neuron.2007.06.018 (2007).
- 838 42 Tamura, H., Kaneko, H., Kawasaki, K. & Fujita, I. Presumed inhibitory neurons in the  
839 macaque inferior temporal cortex: visual response properties and functional interactions  
840 with adjacent neurons. *J Neurophysiol* **91**, 2782-2796, doi:10.1152/jn.01267.2003 (2004).
- 841 43 Hasenstaub, A. *et al.* Inhibitory postsynaptic potentials carry synchronized frequency  
842 information in active cortical networks. *Neuron* **47**, 423-435,  
843 doi:10.1016/j.neuron.2005.06.016 (2005).
- 844 44 Kass, R. E., Ventura, V. & Cai, C. Statistical smoothing of neuronal data. *Network* **14**, 5-  
845 15, doi:10.1088/0954-898x/14/1/301 (2003).
- 846 45 Shimazaki, H. & Shinomoto, S. Kernel bandwidth optimization in spike rate estimation. *J*  
847 *Comput Neurosci* **29**, 171-182, doi:10.1007/s10827-009-0180-4 (2010).
- 848 46 Westheimer, G. Mechanism of saccadic eye movements. *AMA Arch Ophthalmol* **52**, 710-  
849 724, doi:10.1001/archopht.1954.00920050716006 (1954).
- 850 47 Pare, M. & Munoz, D. P. Saccadic reaction time in the monkey: Advanced preparation of  
851 oculomotor programs is primarily responsible for express saccade occurrence. *Journal of*  
852 *Neurophysiology* **76**, 3666-3681 (1996).
- 853 48 Deubel, H. & Schneider, W. X. Saccade target selection and object recognition: evidence  
854 for a common attentional mechanism. *Vision Res* **36**, 1827-1837, doi:10.1016/0042-  
855 6989(95)00294-4 (1996).
- 856 49 Gilzenrat, M. S., Nieuwenhuis, S., Jepma, M. & Cohen, J. D. Pupil diameter tracks changes  
857 in control state predicted by the adaptive gain theory of locus coeruleus function. *Cogn*  
858 *Affect Behav Neurosci* **10**, 252-269, doi:10.3758/CABN.10.2.252 (2010).
- 859 50 Reimer, J. *et al.* Pupil fluctuations track fast switching of cortical states during quiet  
860 wakefulness. *Neuron* **84**, 355-362, doi:10.1016/j.neuron.2014.09.033 (2014).
- 861 51 Jainta, S., Vernet, M., Yang, Q. & Kapoula, Z. The pupil reflects motor preparation for  
862 saccades-even before the eye starts to move. *Frontiers in human neuroscience* **5**, 97 (2011).
- 863 52 Doiron, B., Litwin-Kumar, A., Rosenbaum, R., Ocker, G. K. & Josic, K. The mechanics  
864 of state-dependent neural correlations. *Nat Neurosci* **19**, 383-393, doi:10.1038/nn.4242  
865 (2016).
- 866 53 Mitchell, J. F., Sundberg, K. A. & Reynolds, J. H. Spatial attention decorrelates intrinsic  
867 activity fluctuations in macaque area V4. *Neuron* **63**, 879-888,  
868 doi:10.1016/j.neuron.2009.09.013 (2009).

869 54 Cohen, M. R. & Maunsell, J. H. Attention improves performance primarily by reducing  
870 interneuronal correlations. *Nat Neurosci* **12**, 1594-1600, doi:10.1038/nn.2439 (2009).

871 55 Anastassiou, C. A., Perin, R., Markram, H. & Koch, C. Ephaptic coupling of cortical  
872 neurons. *Nat Neurosci* **14**, 217-223, doi:10.1038/nn.2727 (2011).

873 56 Fries, P. Rhythms for Cognition: Communication through Coherence. *Neuron* **88**, 220-235,  
874 doi:10.1016/j.neuron.2015.09.034 (2015).

875 57 Sirota, A. *et al.* Entrainment of neocortical neurons and gamma oscillations by the  
876 hippocampal theta rhythm. *Neuron* **60**, 683-697, doi:10.1016/j.neuron.2008.09.014 (2008).

877 58 Veit, J., Hakim, R., Jadi, M. P., Sejnowski, T. J. & Adesnik, H. Cortical gamma band  
878 synchronization through somatostatin interneurons. *Nature neuroscience* **20**, 951 (2017).

879 59 Ozeki, H., Finn, I. M., Schaffer, E. S., Miller, K. D. & Ferster, D. Inhibitory stabilization  
880 of the cortical network underlies visual surround suppression. *Neuron* **62**, 578-592,  
881 doi:10.1016/j.neuron.2009.03.028 (2009).

882 60 Tsodyks, M. V., Skaggs, W. E., Sejnowski, T. J. & McNaughton, B. L. Paradoxical effects  
883 of external modulation of inhibitory interneurons. *J Neurosci* **17**, 4382-4388 (1997).

884 61 Douglas, R. J. & Martin, K. A. Mapping the matrix: the ways of neocortex. *Neuron* **56**,  
885 226-238, doi:10.1016/j.neuron.2007.10.017 (2007).

886 62 Bair, W., Zohary, E. & Newsome, W. T. Correlated firing in macaque visual area MT: time  
887 scales and relationship to behavior. *J Neurosci* **21**, 1676-1697 (2001).

888 63 Kohn, A. & Smith, M. A. Stimulus dependence of neuronal correlation in primary visual  
889 cortex of the macaque. *J Neurosci* **25**, 3661-3673, doi:10.1523/JNEUROSCI.5106-  
890 04.2005 (2005).

891 64 Shadlen, M. N. & Newsome, W. T. The variable discharge of cortical neurons: implications  
892 for connectivity, computation, and information coding. *J Neurosci* **18**, 3870-3896 (1998).

893 65 Kriener, B., Tetzlaff, T., Aertsen, A., Diesmann, M. & Rotter, S. Correlations and  
894 population dynamics in cortical networks. *Neural Comput* **20**, 2185-2226,  
895 doi:10.1162/neco.2008.02-07-474 (2008).

896 66 Stepniewska, I., Qi, H.-X. & Kaas, J. H. Projections of the superior colliculus to  
897 subdivisions of the inferior pulvinar in New World and Old World monkeys. *Visual*  
898 *neuroscience* **17**, 529-549 (2000).

899 67 Robinson, D. A. Eye movements evoked by collicular stimulation in the alert monkey.  
900 *Vision research* **12**, 1795-1808 (1972).



901 68 Schiller, P. H., Sandell, J. H. & Maunsell, J. H. The effect of frontal eye field and superior  
902 colliculus lesions on saccadic latencies in the rhesus monkey. *Journal of neurophysiology*  
903 **57**, 1033-1049 (1987).

904 69 Saalmann, Y. B., Pinsk, M. A., Wang, L., Li, X. & Kastner, S. The pulvinar regulates  
905 information transmission between cortical areas based on attention demands. *Science* **337**,  
906 753-756, doi:10.1126/science.1223082 (2012).

907 70 Zhou, H., Schafer, R. J. & Desimone, R. Pulvinar-Cortex Interactions in Vision and  
908 Attention. *Neuron* **89**, 209-220, doi:10.1016/j.neuron.2015.11.034 (2016).

909 71 Petersen, S. E., Robinson, D. L. & Morris, J. D. Contributions of the pulvinar to visual  
910 spatial attention. *Neuropsychologia* **25**, 97-105, doi:10.1016/0028-3932(87)90046-7  
911 (1987).

912 72 Wilke, M., Turchi, J., Smith, K., Mishkin, M. & Leopold, D. A. Pulvinar inactivation  
913 disrupts selection of movement plans. *J Neurosci* **30**, 8650-8659,  
914 doi:10.1523/JNEUROSCI.0953-10.2010 (2010).

915 73 Wilke, M., Kagan, I. & Andersen, R. A. Effects of pulvinar inactivation on spatial decision-  
916 making between equal and asymmetric reward options. *J Cogn Neurosci* **25**, 1270-1283,  
917 doi:10.1162/jocn\_a\_00399 (2013).

918 74 Kawaguchi, Y. & Kubota, Y. Correlation of physiological subgroupings of nonpyramidal  
919 cells with parvalbumin- and calbindinD28k-immunoreactive neurons in layer V of rat  
920 frontal cortex. *J Neurophysiol* **70**, 387-396, doi:10.1152/jn.1993.70.1.387 (1993).

921 75 Galarreta, M. & Hestrin, S. A network of fast-spiking cells in the neocortex connected by  
922 electrical synapses. *Nature* **402**, 72-75, doi:10.1038/47029 (1999).

923 76 Cruikshank, S. J., Urabe, H., Nurmikko, A. V. & Connors, B. W. Pathway-specific  
924 feedforward circuits between thalamus and neocortex revealed by selective optical  
925 stimulation of axons. *Neuron* **65**, 230-245, doi:10.1016/j.neuron.2009.12.025 (2010).

926 77 Gibson, J. R., Beierlein, M. & Connors, B. W. Two networks of electrically coupled  
927 inhibitory neurons in neocortex. *Nature* **402**, 75-79, doi:10.1038/47035 (1999).

928 78 Agmon, A. & Connors, B. W. Correlation between Intrinsic Firing Patterns and  
929 Thalamocortical Synaptic Responses of Neurons in Mouse Barrel Cortex. *Journal of*  
930 *Neuroscience* **12**, 319-329 (1992).

931 79 Poulet, J. F. & Petersen, C. C. Internal brain state regulates membrane potential synchrony  
932 in barrel cortex of behaving mice. *Nature* **454**, 881-885, doi:10.1038/nature07150 (2008).

933 80 Vinck, M., Batista-Brito, R., Knoblich, U. & Cardin, J. A. Arousal and locomotion make  
934 distinct contributions to cortical activity patterns and visual encoding. *Neuron* **86**, 740-754,  
935 doi:10.1016/j.neuron.2015.03.028 (2015).



936 81 Arroyo, S., Bennett, C. & Hestrin, S. Correlation of Synaptic Inputs in the Visual Cortex  
937 of Awake, Behaving Mice. *Neuron* **99**, 1289-1301 e1282,  
938 doi:10.1016/j.neuron.2018.08.008 (2018).

939 82 John, E. R. *et al.* Invariant reversible QEEG effects of anesthetics. *Conscious Cogn* **10**,  
940 165-183, doi:10.1006/ccog.2001.0507 (2001).

941 83 Zohary, E., Shadlen, M. N. & Newsome, W. T. Correlated neuronal discharge rate and its  
942 implications for psychophysical performance. *Nature* **370**, 140-143,  
943 doi:10.1038/370140a0 (1994).

944 84 Abbott, L. F. & Dayan, P. The effect of correlated variability on the accuracy of a  
945 population code. *Neural Comput* **11**, 91-101, doi:10.1162/089976699300016827 (1999).

946 85 Bartolo, R., Saunders, R. C., Mitz, A. R. & Averbeck, B. B. Information-Limiting  
947 Correlations in Large Neural Populations. *J Neurosci* **40**, 1668-1678,  
948 doi:10.1523/JNEUROSCI.2072-19.2019 (2020).

949 86 Averbeck, B. B., Latham, P. E. & Pouget, A. Neural correlations, population coding and  
950 computation. *Nat Rev Neurosci* **7**, 358-366, doi:10.1038/nrn1888 (2006).

951 87 Lee, D. & Malpeli, J. G. Effects of saccades on the activity of neurons in the cat lateral  
952 geniculate nucleus. *Journal of Neurophysiology* **79**, 922-936 (1998).

953 88 Nassi, J. J., Avery, M. C., Cetin, A. H., Roe, A. W. & Reynolds, J. H. Optogenetic  
954 Activation of Normalization in Alert Macaque Visual Cortex. *Neuron* **86**, 1504-1517,  
955 doi:10.1016/j.neuron.2015.05.040 (2015).

956 89 Ruiz, O. *et al.* Optogenetics through windows on the brain in the nonhuman primate. *J*  
957 *Neurophysiol* **110**, 1455-1467, doi:10.1152/jn.00153.2013 (2013).

958 90 Konig, S. D. & Buffalo, E. A. A nonparametric method for detecting fixations and saccades  
959 using cluster analysis: removing the need for arbitrary thresholds. *J Neurosci Methods* **227**,  
960 121-131, doi:10.1016/j.jneumeth.2014.01.032 (2014).

961 91 Mitra, P. P. & Pesaran, B. Analysis of dynamic brain imaging data. *Biophys J* **76**, 691-708,  
962 doi:10.1016/S0006-3495(99)77236-X (1999).

963 92 Zeitler, M., Fries, P. & Gielen, S. Assessing neuronal coherence with single-unit, multi-  
964 unit, and local field potentials. *Neural Comput* **18**, 2256-2281,  
965 doi:10.1162/neco.2006.18.9.2256 (2006).

966 93 Vinck, M., Battaglia, F. P., Womelsdorf, T. & Pennartz, C. Improved measures of phase-  
967 coupling between spikes and the Local Field Potential. *J Comput Neurosci* **33**, 53-75,  
968 doi:10.1007/s10827-011-0374-4 (2012).

969

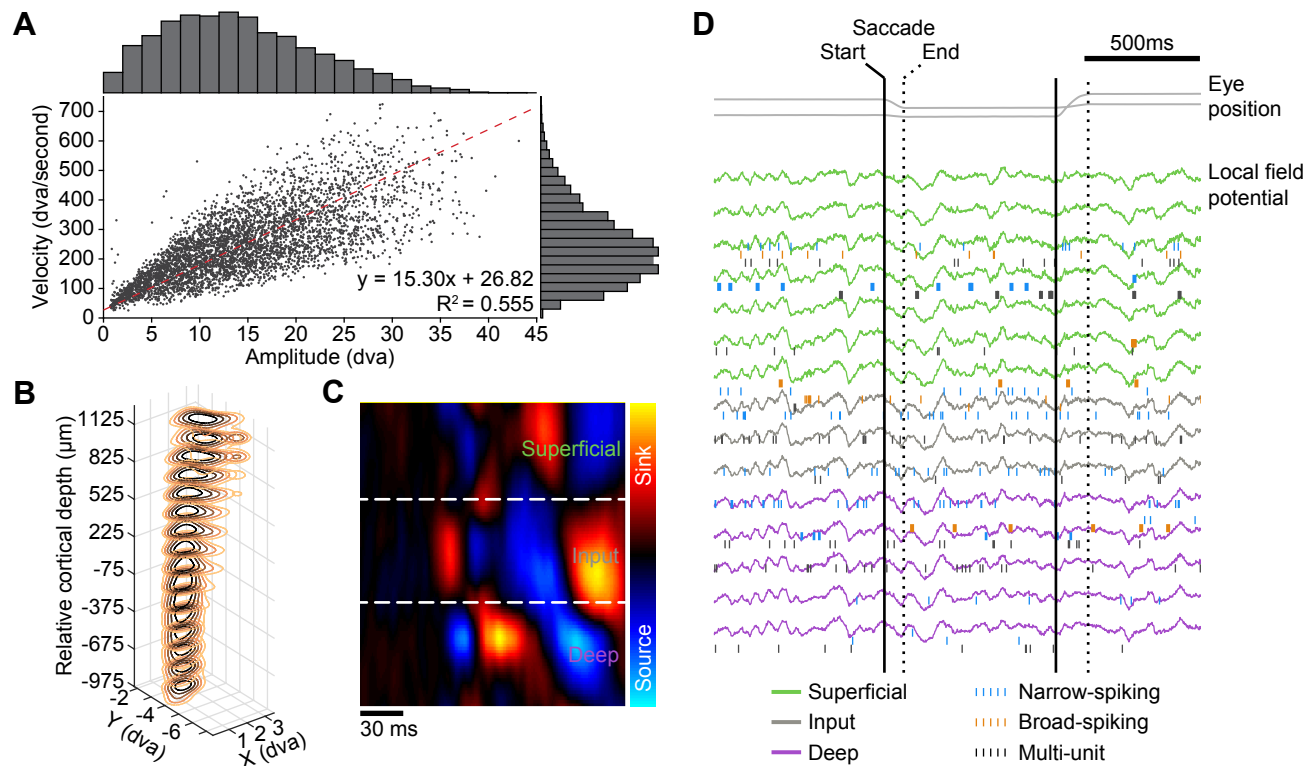

**Figure 1. Laminar Recordings and Saccade Identification**

(A) The amplitude-velocity relationship ('main sequence') for all saccades ( $n = 4420$ ) in the dataset. An approximately linear trend is expected for saccades, as is found here ( $R^2 = 0.555$ ). dva = degrees of visual angle.

(B) Stacked contour plot showing spatial receptive fields (RFs) along the laminar probe from an example session. The RFs are well aligned, indicating perpendicular penetration down a cortical column. Zero depth represents the center of the input layer as estimated with current source density (CSD) analysis.

(C) CSD displayed as a colored map. The x-axis represents time from stimulus onset; the y-axis represents cortical depth. The CSD map has been spatially smoothed for visualization.

(D) Example of continuous eye-tracker and electrophysiological recordings. Eye traces are plotted at the top in grey. LFP traces are plotted by depth below, and spikes are overlaid on the corresponding channel. LFP traces have been color coded by layer identity; spikes have been color coded by cell type.

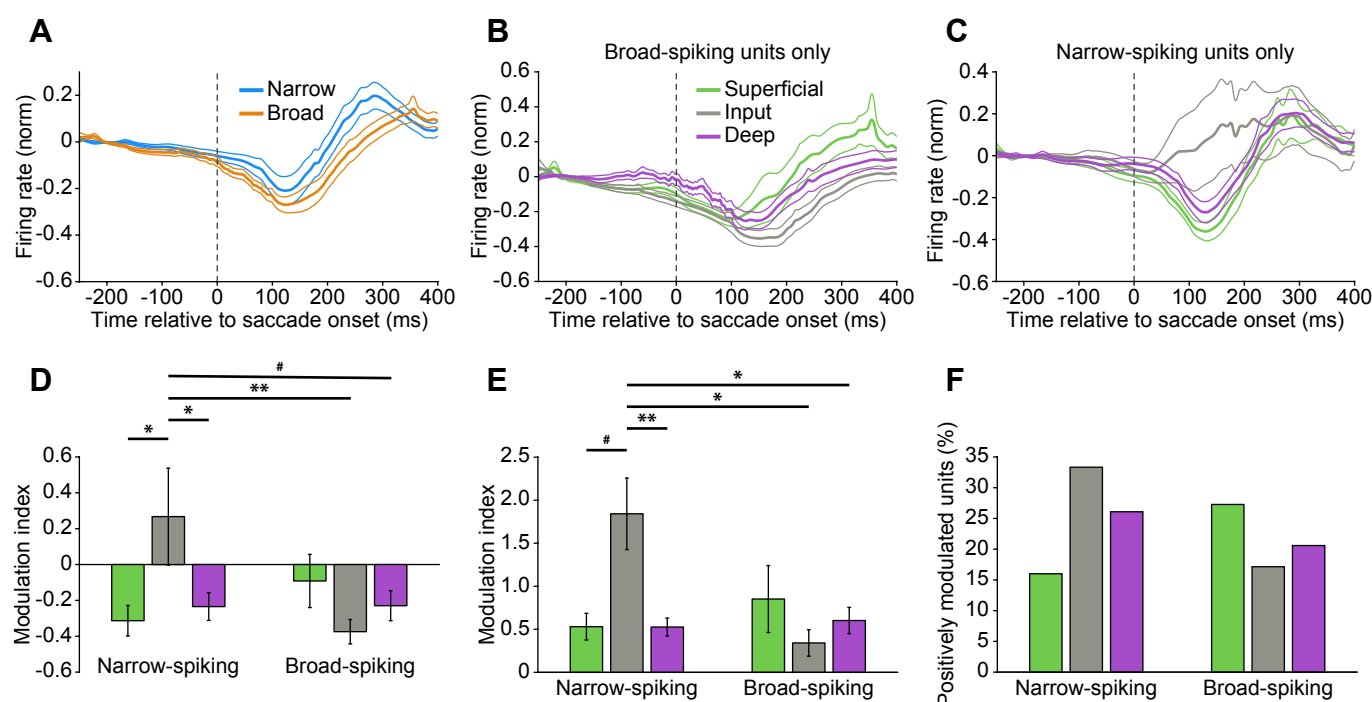

**Figure 2. Narrow-Spiking Input Layer Units Display Peri-Saccadic Enhancement of Firing**

(A) Average peri-saccadic normalized firing rate for broad- ( $n = 102$  units) and narrow-spiking ( $n = 95$  units) populations. Thin lines indicate standard error of the mean.

(B) As in (A), but including only broad-spiking units from the superficial ( $n = 33$ ), input ( $n = 35$ ), and deep ( $n = 34$ ) layer populations.

(C) As in (A), but including only narrow-spiking units from the superficial ( $n = 25$  units), input ( $n = 24$  units), and deep ( $n = 46$  units) layer populations.

(D) Average peri-saccadic modulation index for the six neural subpopulations. Two-way ANOVA ( $F_{layer} = 1.16$ ,  $P = 0.3151$ ;  $F_{cell\ type} = 1.84$ ,  $P = 0.1765$ ;  $F_{interaction} = 5.98$ ,  $P = 0.0030$ ) with Tukey's multiple comparison tests (narrow-spiking superficial vs narrow-spiking input,  $*P = 0.0423$ ; narrow-spiking input vs narrow-spiking deep,  $*P = 0.0495$ ; narrow-spiking input vs broad-spiking input,  $**P = 0.0070$ ; narrow-spiking input vs broad-spiking deep,  $\#P = 0.0817$ ). Error bars indicate standard error of the mean.

(E) Average peri-saccadic modulation index for positively modulated units from the six neural subpopulations. Two-way ANOVA ( $F_{layer} = 1.87$ ,  $P = 0.1666$ ;  $F_{cell\ type} = 2.32$ ,  $P = 0.1355$ ;  $F_{interaction} = 5.51$ ,  $P = 0.0077$ ) with Tukey's multiple comparison tests (narrow-spiking superficial vs narrow-spiking input,  $\#P = 0.0833$ ; narrow-spiking input vs narrow-spiking deep,  $**P = 0.0073$ ; narrow-spiking input vs broad-spiking input,  $*P = 0.0106$ ; narrow-spiking input vs broad-spiking deep,  $*P = 0.0384$ ). Error bars indicate standard error of the mean.

(F) Proportion of units in each neural subpopulation with a positive peri-saccadic modulation index.

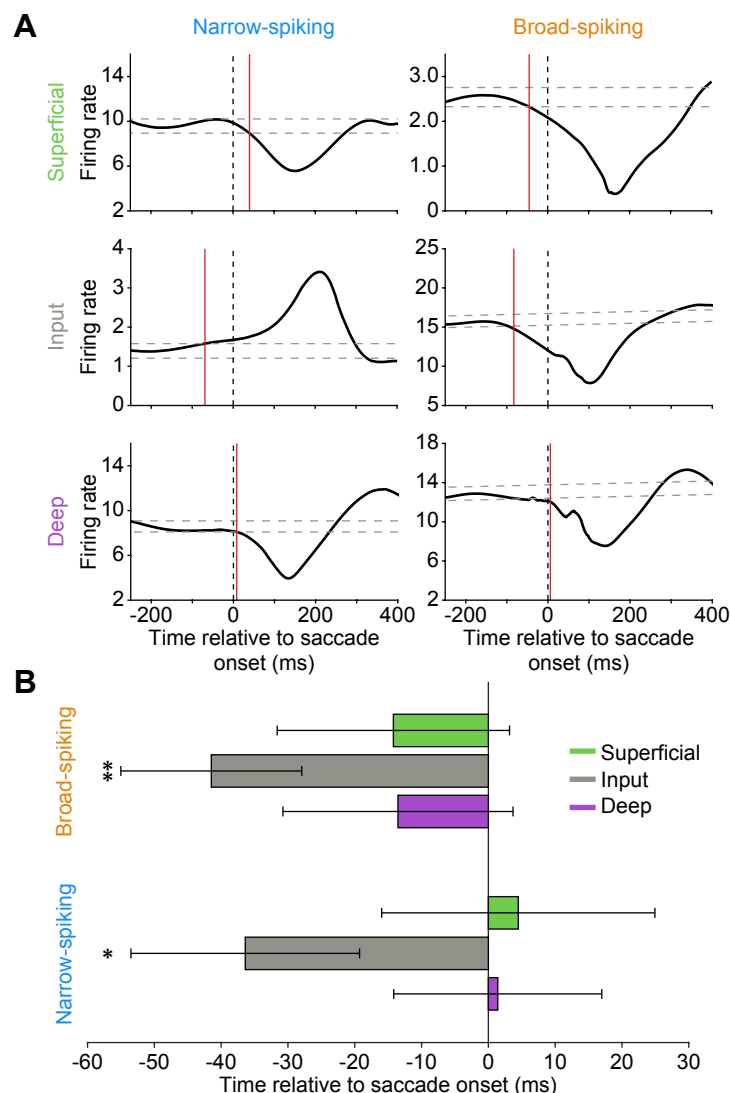

**Figure 3. Input Layer Units Display Modulation Prior to Saccade Onset**

(A) Six example single-units demonstrating the approach for identifying the time of significant peri-saccadic firing rate modulation. 95% confidence intervals were calculated for the baseline activity of each unit (dashed grey lines) and the first deviation outside of those bounds was marked as the time of first significant response (red line). The example units shown are the same as those from Figure S1B.

(B) Average timing of first significant peri-saccadic modulation for the six neural subpopulations. Input layer units, both broad- and narrow-spiking, show modulation prior to saccade onset. Two-tailed one-sample t-test (broad-spiking input layer,  $**P = 0.0049$ ; narrow-spiking input layer,  $*P = 0.0492$ ). Error bars indicate standard error of the mean.

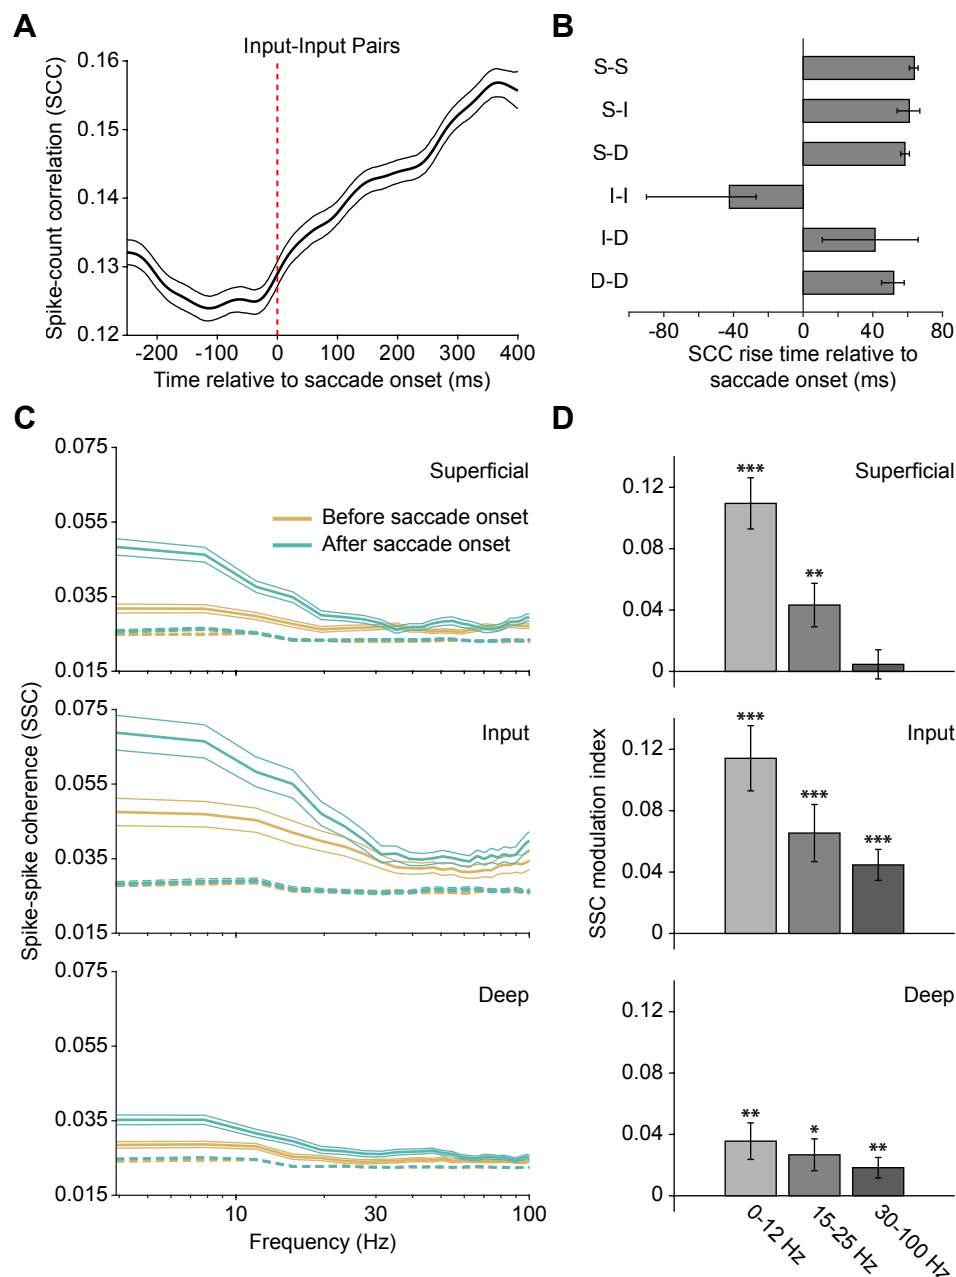

**Figure 4. Saccade Onset Increases Correlated Variability Most Prominently in the Input Layer**

(A) Spike count correlations as a function of time relative to saccade onset for input-input unit pairs ( $n = 240$  pairs). Correlations were calculated with a sliding 201 ms window. Thin lines indicate bootstrapped 95% confidence intervals.

(B) Average start time of spike count correlation rise relative to saccade onset. Y-axis labels indicate layer identity of unit pairs (S - superficial; I - input; D - deep). Error bars represent bootstrapped 95% confidence intervals. Input-input pairs begin to rise before saccade onset and before all other pair combinations. All other pairs respond after saccade onset.

(C) Average spike-spike coherence between pairs of simultaneously recorded units (single-units and multi-units) before (-200 to 0 ms) and after (0 to 200 ms) saccade onset as a function of frequency. Superficial layer,  $n = 299$  pairs; input layer,  $n = 191$  pairs; deep layer,  $n = 604$  pairs. Thin lines indicate standard error of the mean. Dashed lines indicate spike-spike coherence for shuffled data.

(D) Same data as in (C), but averaged across three frequency bands and plotted as a modulation index:  $(SSC_{after} - SSC_{before}) / (SSC_{after} + SSC_{before})$ . Two-tailed one-sample t-tests (Superficial 0-12 Hz,  $***P = 1.64 \times 10^{-10}$ ; Superficial 15-25 Hz,  $**P = 0.0027$ ; Superficial 30-100 Hz,  $P = 0.5468$ ; Input 0-12 Hz,  $***P = 2.2131 \times 10^{-7}$ ; Input 15-25 Hz,  $***P = 5.5458 \times 10^{-4}$ ; Input 30-100 Hz,  $***P = 1.6503 \times 10^{-5}$ ; Deep 0-12 Hz,  $**P = 0.0013$ ; Deep 15-25 Hz,  $*P = 0.0116$ ; Deep 30-100 Hz,  $**P = 0.0050$ ). Error bars indicate standard error of the mean.

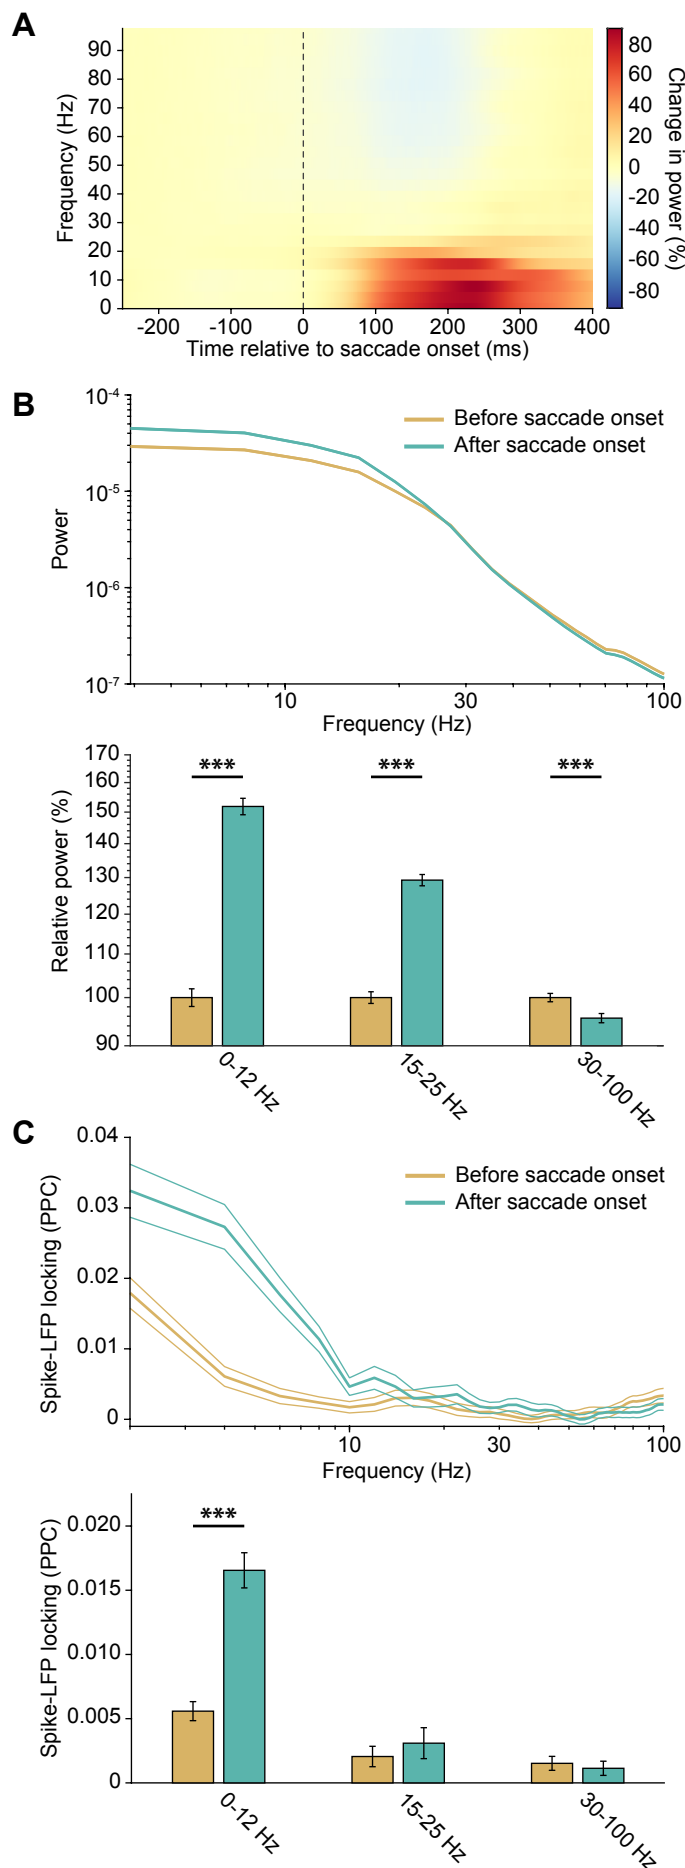

**Figure 5. Saccade Onset Increases Low Frequency Power and Spike-LFP Locking**

(A) Time-frequency representation (spectrogram) of LFP power around saccade onset. Signal strength is represented as percent change in power (i.e. the raw power at each timepoint is divided by the average power in the baseline period, defined here as 250 to 150 ms before saccade onset).

(B) Top: Average power spectra before (-200 to 0 ms) and after (0 to 200 ms) saccade onset. Thin lines indicate standard error of the mean. Bottom: Same data as in top, but averaged across three frequency bands and normalized to data before saccade onset for visualization. Two tailed paired-sample t-tests (0-12 Hz,  $***P = 3.4669 \times 10^{-92}$ ; 15-25 Hz,  $***P = 9.3690 \times 10^{-74}$ ; 30-100 Hz,  $***P = 2.7322 \times 10^{-9}$ ). Error bars indicate standard error of the mean.

(C) Top: Average spike-LFP locking spectra before (-200 to 0 ms) and after (0 to 200 ms) saccade onset. Thin lines indicate standard error of the mean. Bottom: Same data as in top, but averaged across three frequency bands. Two tailed paired-sample t-tests (0-12 Hz,  $***P = 1.7147 \times 10^{-19}$ ; 15-25 Hz,  $P = 0.1598$ ; 30-100 Hz,  $P = 0.1091$ ). Error bars indicate standard error of the mean.

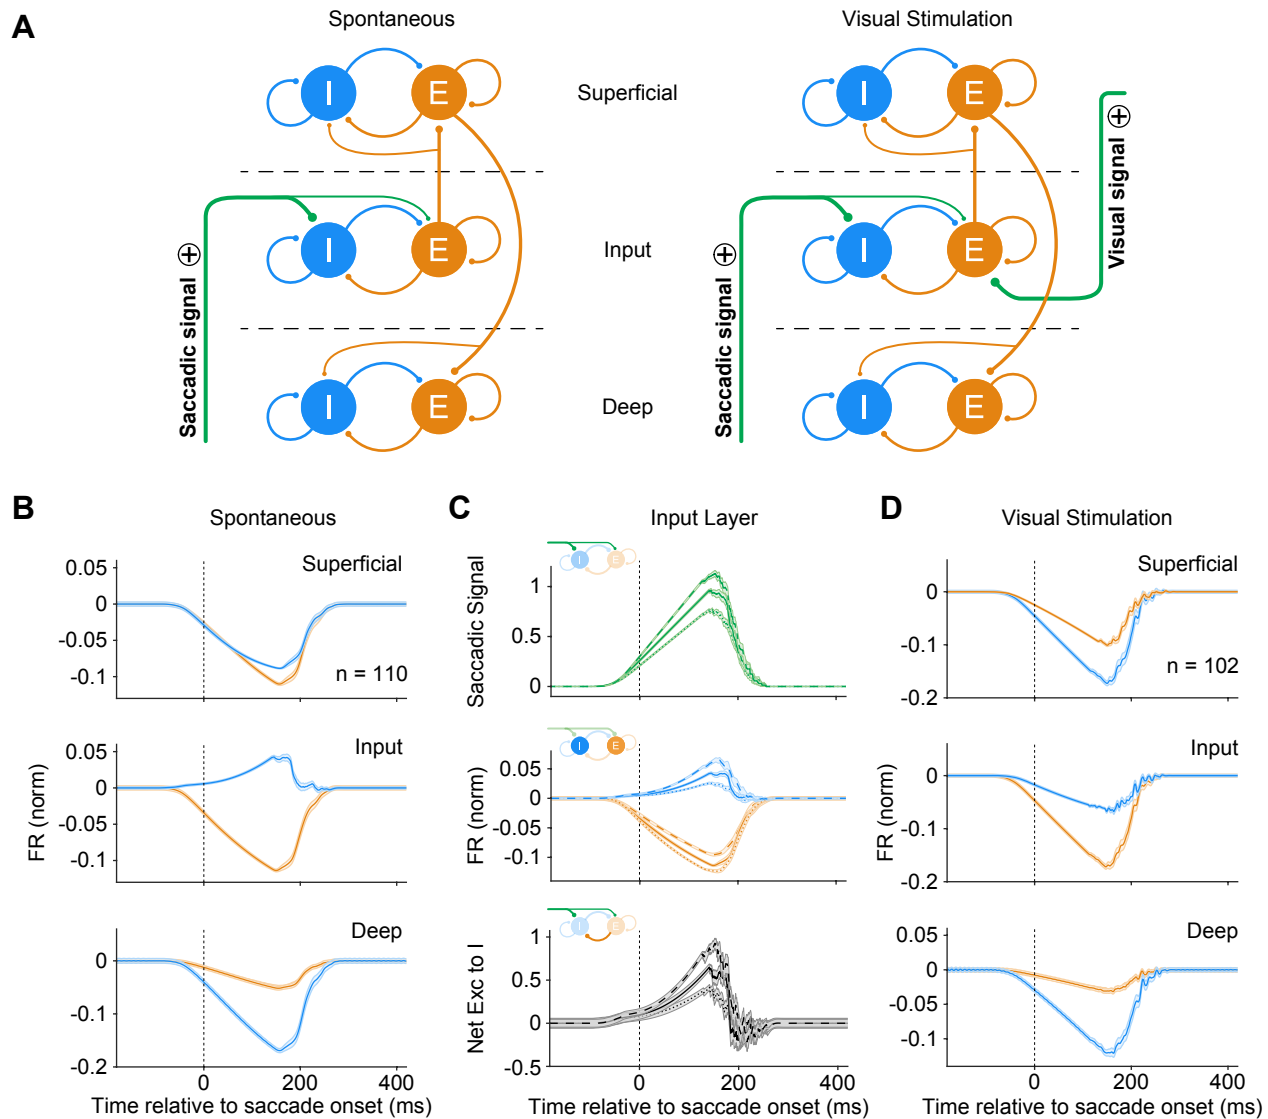

**Figure 6. A Computational Model Confirms that Activation of an Input Layer-Targeting Projection Induces Saccadic Suppression**

(A) Connectivity between populations in our computational model. Excitatory (E) and inhibitory (I) populations within each layer project to each other as well as themselves. The input layer excitatory population projects to the superficial layer, while the superficial excitatory population projects to the deep layer. In our model of spontaneous saccades (left), we activate an external excitatory projection that selectively targets the input layer. In our model of saccades executed in the presence of visual stimuli (right), we add an additional input that selectively targets input layer excitatory neurons.

(B) Normalized peri-saccadic firing rate of simulated neural subpopulations during spontaneously executed saccades ( $n = 110$  simulated saccades). The input layer inhibitory subpopulation shows enhancement of firing, while all other subpopulations show suppression.

(C) Further dissection of input layer activity. (Top) The saccadic signal arriving in the input layer was simulated with a ramping function. Represented here are saccadic signals of three different strengths. From weakest to strongest, these are represented by dotted, continuous, and dashed lines, both here and in the following subpanels. (Middle) The excitatory and inhibitory input layer subpopulation firing rates in response to three saccadic signals of varying strength. (Bottom) Net excitatory drive onto the inhibitory input layer subpopulation in response to three saccadic signals of varying strength. The excitatory drive is the sum of drive from the external saccadic input and drive from the local excitatory population.

(D) Normalized peri-saccadic firing rate of simulated neural subpopulations during saccades executed in the presence of visual stimulation ( $n = 102$  simulated saccades). Visual stimulation is represented by the activation of a second input, which selectively targets the input layer excitatory subpopulation. Here, all subpopulations within the cortical column show peri-saccadic suppression.



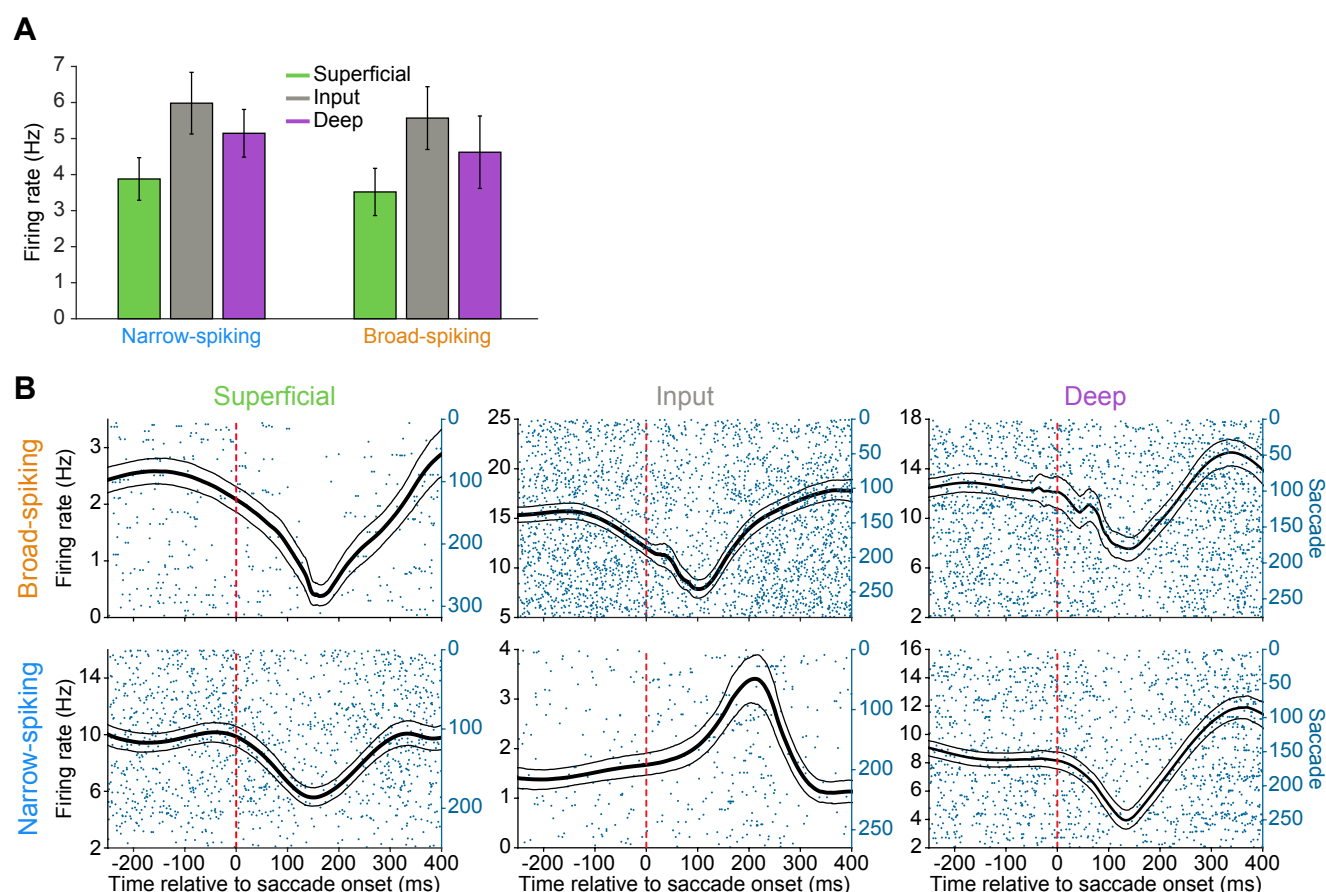

**Figure S1. Peri-Saccadic Single-Unit Firing Rate Estimation**

(A) Spontaneous firing rates of each neural subpopulation.

(B) Peri-saccadic single-unit firing rates were estimated by smoothing individual spikes with gaussian kernels. The kernel bandwidth was selected for each unit at each point in time using an optimization algorithm that minimizes the mean integrated squared error<sup>45</sup>. The firing rate estimates produced by this approach are shown for six representative example units, one from each recorded neural subpopulation. The smoothed firing rates (black) are overlaid on the raster plots showing raw spikes (blue). In the raster plot, each row represents a single saccade. Thin lines are bootstrapped 95% confidence intervals of the firing rate estimate.



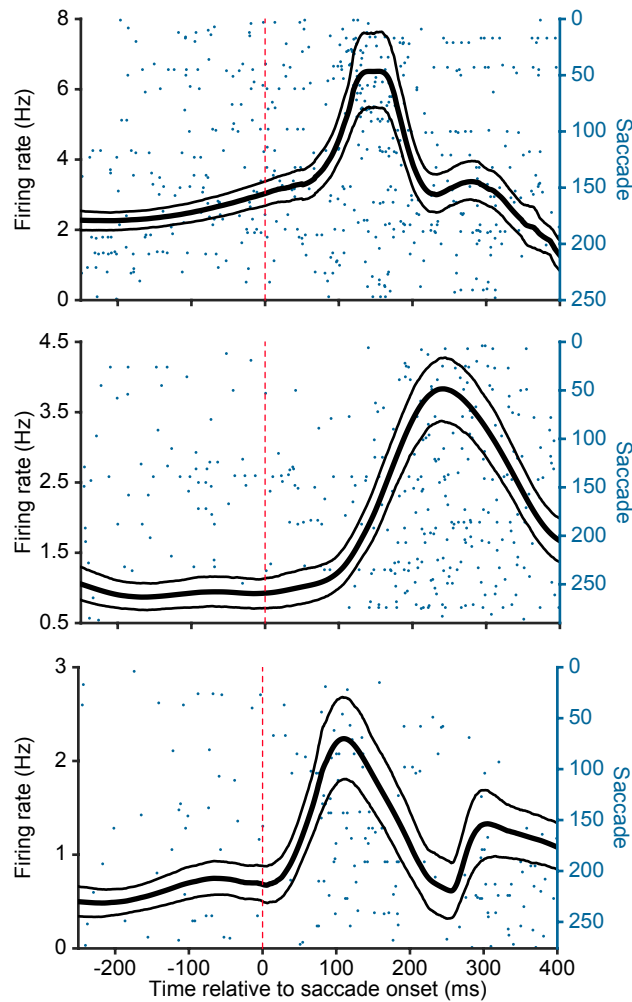

## Figure S2. Additional Narrow-Spiking Input Layer Single-Unit Examples

Additional example narrow-spiking input layer single-units that display peri-saccadic enhancement of firing. Firing rates were estimated using a kernel smoothing approach and bandwidth optimization algorithm<sup>45</sup>. The smoothed firing rates (black) are overlaid on the spike raster plots (blue). Thin lines are bootstrapped 95% confidence intervals of the firing rate estimate.

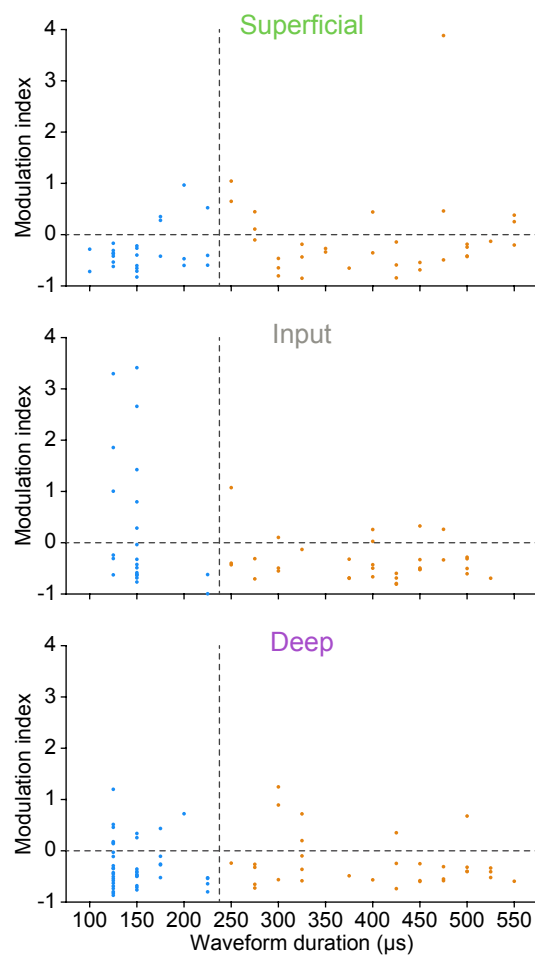

### Figure S3. Single-Unit Modulation Indices

Single-unit modulation indices as a function of spike waveform duration. Neural populations from each layer are displayed in different subplots. The dashed horizontal line represents a modulation index of zero (no firing rate change), while the dashed vertical line represents the threshold separating narrow- and broad- spiking units.

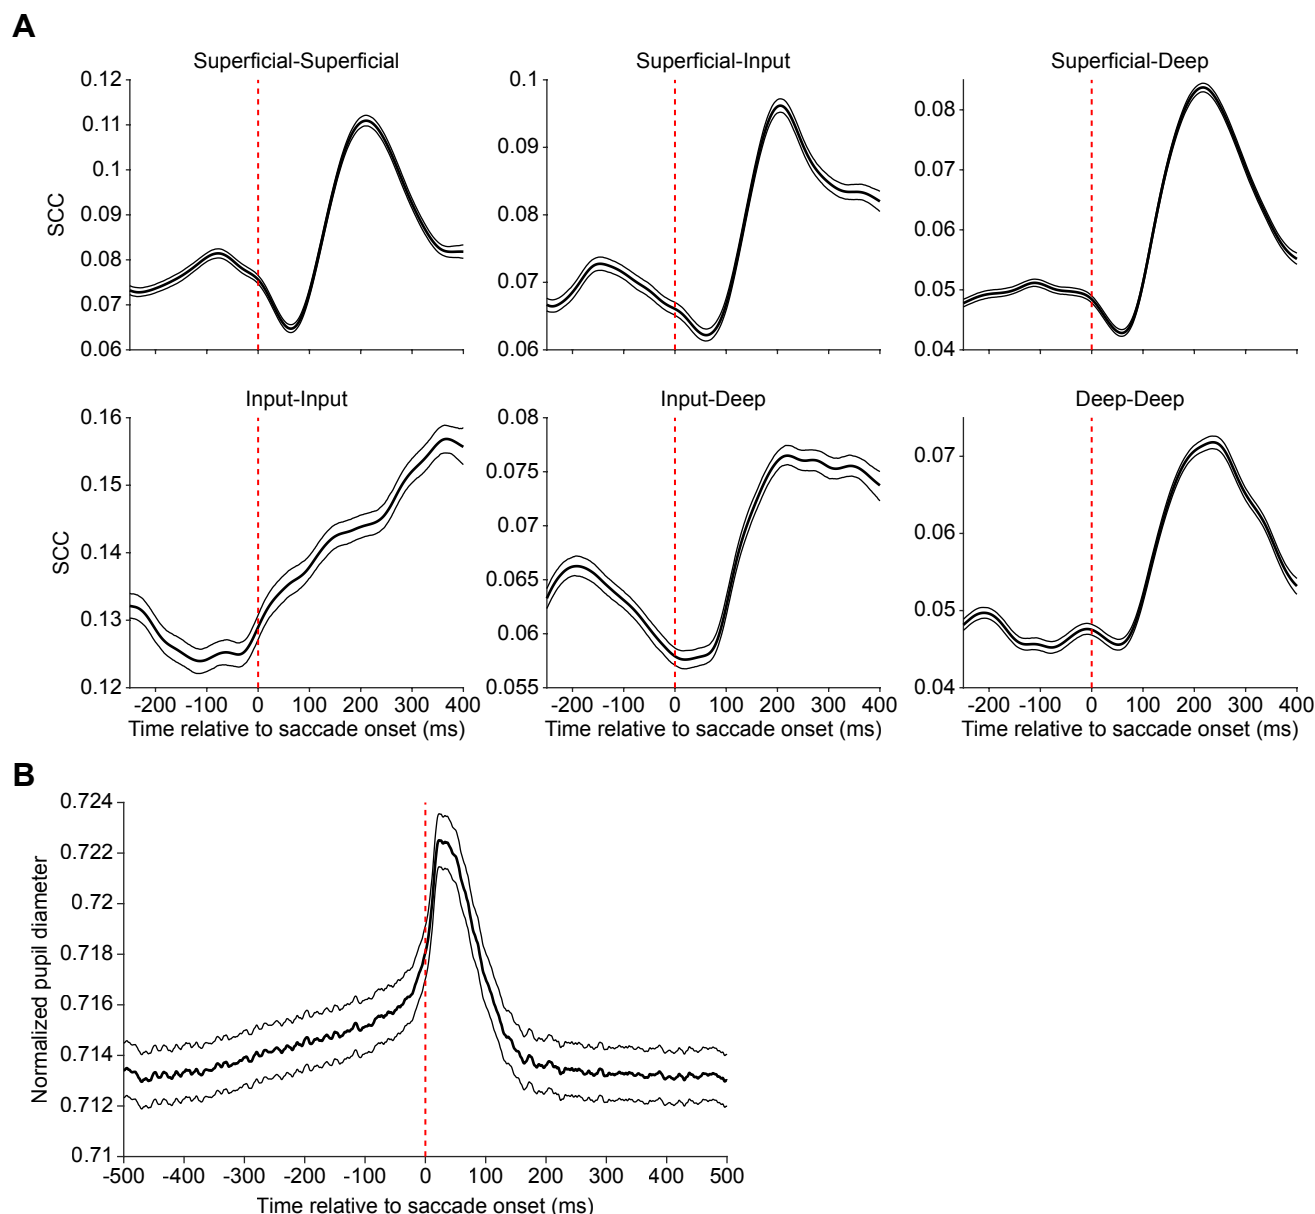

**Figure S4. Input Layer Pairs Show Increases in Spike Count Correlations Prior to Saccade Onset**

(A) Spike count correlations as a function of time relative to saccade onset for all combinations of layer-wise unit pairs. Superficial-superficial,  $n = 442$  pairs; superficial-input,  $n = 558$  pairs; superficial-deep,  $n = 755$  pairs; input-input,  $n = 240$  pairs; input-deep,  $n = 501$  pairs; deep-deep,  $n = 680$  pairs. Correlations were calculated with a sliding 201 ms window. Thin lines indicate bootstrapped 95% confidence intervals.

(B) Normalized pupil diameter around the time of saccade onset ( $n = 4420$  saccades). Thin lines indicate standard error of the mean.

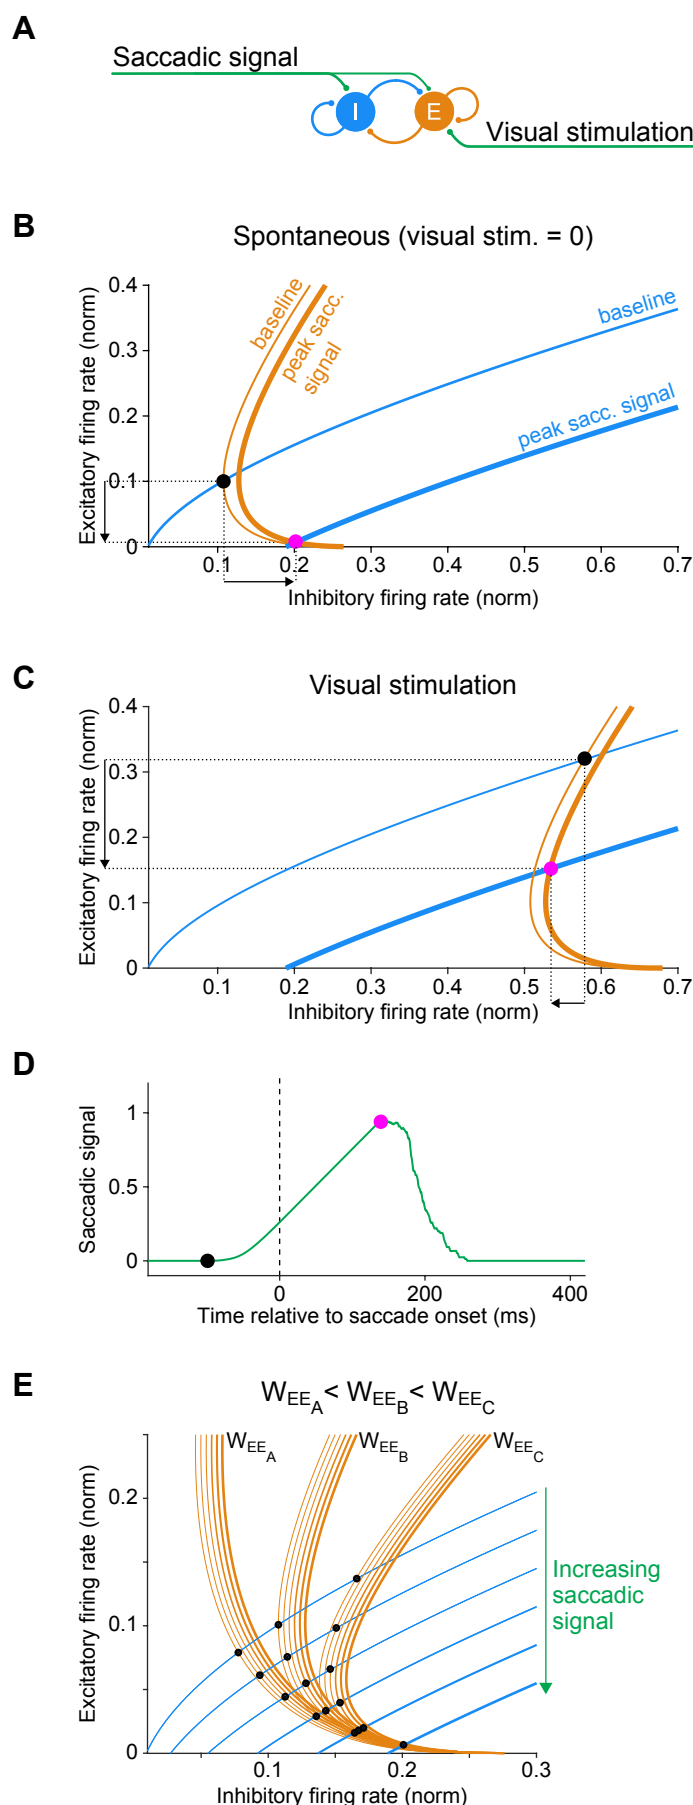

**Figure S5. Phase Plane Analysis of the Input Layer E-I System**

(A) The E-I network in the input layer.

(B) The nullclines and stable activity levels of the input layer E and I populations during simulation of spontaneous activity. Equations and parameters are the same as those described in the Methods and used in Figure 6. The orange and blue curves show the E and I nullclines, respectively, of the E-I network in (A). Each point on a nullcline indicates the steady state firing rate of the E or I population when the activity of the other population is fixed, i.e. the rate of change in equations (3) or (4) is zero. The ISN and non-ISN regimes of the network are demarcated by the switch between positive and negative slopes along the E nullclines. This ability to switch is a consequence of strong E-E connectivity, and is absent when the E-E connectivity strength is either weak or zero. The thin nullclines depict firing rates when saccadic input is at baseline; the thick nullclines depict firing rates when saccadic input increases by a non-zero value. The intersections of the E and I nullclines indicate the steady state firing rates at which the network stabilizes if allowed to seek equilibrium (indicated by black and pink dots at baseline and during peak saccadic suppression, respectively). As illustrated here, the nullclines for our model intersect in the non-ISN regime in the absence of visual input, causing E and I activity to shift in opposite directions in response to the saccadic signal.

(C) Same as in (B), but during simulated visual stimulation. The addition of excitatory input to the E population shifts the E nullclines to the right, causing them to intersect with the I nullclines in the ISN regime. As illustrated here, this causes the E and I populations to shift in the same direction in response to the saccadic signal.

(D) The approximate level of saccadic signal strength that corresponds to the E (orange) and I (blue) nullcline sets shown in (B) and (C). The phase plane analysis is most applicable to constant levels of saccadic signal, and is only an approximate depiction of the scenario of a ramp signal shown in (D), and as used in the model simulation in Figure 6.

(E) Effect of E-E connection strength on inhibitory firing rate changes in response to the saccadic signal. Each set of E nullclines corresponds to a given E-E connection strength ( $W_{EE}$ ), and illustrates the effects of raising saccadic signal magnitude (indicated by greater line thickness), causing either increases or decreases in steady state firing rates (black dots), as determined by their intersection with the I nullclines. This phase plane analysis approximately predicts three ways in which I firing rate can shift in response to increasing saccadic input: 1) it increases quickly in response to a small increase in saccadic signal ( $W_{EEA}$ ), 2) it increases minimally until a threshold level of saccadic signal is reached ( $W_{EEB}$ ), or 3) it first decreases then increases with rising saccadic signal strength ( $W_{EEC}$ ). The operating regime shown in the simulation results (Figure 6) that recapitulate experimental observations corresponds to the E-E connection strength illustrated by  $W_{EEB}$ . In this case, the network is maintained at the boundary between ISN (positive E nullcline slope) and non-ISN (negative E nullcline slope) regimes in the absence of the saccadic signal.
